1 **Divergence in female damselfly sensory structures is consistent with a species recognition**  
2 **function but shows no evidence of reproductive character displacement**

3

4 Alexandra A. Barnard<sup>1,2</sup> and John P. Masly<sup>1</sup>

5

6 <sup>1</sup>Ecology & Evolutionary Biology Program, Department of Biology, University of Oklahoma,

7 Norman, OK, USA

8 [<sup>2</sup>alex.barnard@ou.edu](mailto:alex.barnard@ou.edu)

9

10 **Keywords:** mechanosensor, reproductive character displacement, mating, reproductive  
11 isolation, damselfly

12

13 **Abstract**

14 Males and females exchange signals prior to mating that convey information such as sex,  
15 species identity, or individual condition. In some animals, tactile signals relayed during physical  
16 contact between males and females before and during mating appear to be important for mate  
17 choice and reproductive isolation. This is common among odonates, when a male grasps a  
18 female's thorax with his terminal appendages prior to copulation, and the female subsequently  
19 controls whether copulation occurs by bending her abdomen to complete intromission. It has  
20 been hypothesized that mechanosensory sensilla on the female thoracic plates mediate mating  
21 decisions, but it has been difficult to test this idea. Here, we use North American damselflies in  
22 the genus *Enallagma* (Odonata: Coenagrionidae) to test the hypothesis that variation in female

23 sensilla traits is important for species recognition. *Enallagma anna* and *E. carunculatum*  
24 hybridize in nature, but experience strong reproductive isolation as a consequence of  
25 divergence in male terminal appendage morphology. We quantified several mechanosensory  
26 sensilla phenotypes on the female thorax among multiple populations of both species and  
27 compared divergence in these traits in sympatry versus allopatry. Although these species  
28 differed in features of sensilla distribution within the thoracic plates, we found no strong  
29 evidence of reproductive character displacement among the sensilla traits we measured in  
30 regions of sympatry. Our results suggest that species-specific placement of female  
31 mechanoreceptors may be sufficient for species recognition, although other female sensory  
32 phenotypes might have diverged in sympatry to reduce interspecific hybridization.  
33

## 34 **Introduction**

35           For sexual species, maintenance of species boundaries relies on reproductive isolation  
36 (RI) between recently diverged species (Mayr, 1942). Premating reproductive isolating barriers,  
37 including behavioral or sexual isolation, often evolve earlier in the speciation process than  
38 postmating barriers in a variety of animal taxa (*e.g.*, McMillan et al., 1997; Price and Bouvier,  
39 2002; Mendelson and Wallis, 2003; Dopman et al., 2010; Sánchez-Guillén et al., 2012; Williams  
40 and Mendelson, 2014; Castillo et al., 2015; Barnard et al., 2017). Behavioral isolation requires  
41 that mate recognition signals and/or preferences diverge between populations, which  
42 ultimately results in the ability of individuals to discriminate conspecifics from heterospecifics.  
43 Species recognition signals may rely on a variety of sensory modalities such as color (Wiernasz  
44 and Kingsolver, 1992; Sætre et al., 1997; Jiggins et al., 2001; Boughman et al., 2005; Kronforst  
45 et al., 2006; Williams and Mendelson, 2014), courtship behavior (Stratton and Uetz, 1986),  
46 sound/vibration (Ewing and Bennet-Clark, 1968; Wells and Henry, 1998; Shaw, 2000; Gerhardt  
47 and Huber, 2002; Arthur et al., 2013), and volatile chemicals (Coyne et al., 1994; Noor and  
48 Coyne, 1996; Trabalon et al., 1997; Rafferty and Boughman, 2006). Often, multiple signals act  
49 in concert to affect species recognition (*e.g.*, Costanzo and Monteiro, 2007; Girard et al., 2015).

50           Although much is known about the importance of visual, auditory, and chemical signals  
51 and responses in sexual communication and species recognition, we know relatively little about  
52 other sensory modalities that may have strong effects on individual mating decisions. Tactile  
53 signals have been hypothesized to contribute to mating decisions (Mendelson and Shaw, 2012),  
54 but it is unclear whether tactile cues could represent a primary species recognition signal, given  
55 that visual, auditory, and chemical cues usually act earlier during the mating sequence.

56 Research on the prevalence of tactile signals in mating decisions is limited (Coleman, 2008)  
57 partly because of the experimental challenge it poses: whereas other sensory modalities  
58 present male signals to a focal female from a distance, studying female preference for tactile  
59 cues requires contact between males and females, which is not always easily achieved or  
60 quantified under controlled conditions.

61         Despite this challenge, understanding the role of tactile signals along the continuum  
62 between intraspecific mate choice and interspecific RI is important because it broadens our  
63 understanding of the causes and consequences of a common pattern in nature— the rapid  
64 divergence of male genital morphology between species. It has been suggested that rapid  
65 genital differentiation can cause RI (Dufour 1844), although mechanical incompatibilities  
66 between heterospecific male and female genitalia do not appear to be a common cause of RI  
67 (Shapiro and Porter, 1989; Masly, 2012; Simmons, 2014). However, observations both within  
68 (Eberhard, 1994; Edvardsson and Göran, 2000; Briceño and Eberhard, 2009a; Briceño and  
69 Eberhard, 2009b; Frazee and Masly, 2015) and between species (Patterson and Thaeler Jr,  
70 1982; Robertson and Paterson, 1982; Eberhard, 1992; Coyne, 1993; Barnard et al., 2017)  
71 suggest that male reproductive structures may convey tactile information to females that  
72 affects their subsequent behavior and/or physiology. Although female genital structures often  
73 appear invariant among closely related species (Shapiro and Porter, 1989), subtle  
74 morphological differences (*e.g.*, Kamimura and Mitsumoto, 2011; Yassin and Orgogozo, 2013)  
75 could enable females to detect variation among males' morphology. Female variation in  
76 detection ability could also occur in signal processing at the level of neurons, neural networks,  
77 and/or in the distribution and morphology of sensory structures that receive male tactile

78 signals. These sensory structures may exist not just in the female genitalia or reproductive  
79 tract, but in any region of the female that receives contact from male structures.

80 Female sensory structures that reside in body regions that contact species-specific male  
81 structures during mating have been documented in several arthropods, including flies  
82 (Eberhard, 2001; Ingram et al., 2008) and damselflies (Cordoba-Aguilar, 1999, 2002, 2005;  
83 Robertson and Paterson, 1982). Other studies have demonstrated that tactile cues from male  
84 grasping organs influence female mating responses, either via experimental manipulation of  
85 male structures and desensitization of females (Eberhard, 2002; Briceño et al., 2007; Briceño  
86 and Eberhard, 2009a; Eberhard, 2010; Myers et al., 2016), or via comparison of female behavior  
87 when females are grasped by males with varying terminal appendage morphologies (Sánchez-  
88 Guillén et al., 2012; Sánchez-Guillén et al., 2014; Barnard et al., 2017). Premating tactile  
89 isolation may also be important in vision-limited vertebrates. For example, contact cues via the  
90 lateral line system may influence female mate choice in a cavefish (Plath et al., 2004; but see  
91 Rüschenbaum and Schlupp, 2013).

92 Tactile signals appear to be a significant cause of RI in Zygoptera, the damselfly suborder  
93 of Odonata (Krieger and Krieger-Loibl, 1958; Loibl, 1958; Robertson and Paterson, 1982; Corbet,  
94 1999). Concentrations of cuticular mechanoreceptors (sensilla) on the female thorax have been  
95 described in several coenagrionid damselfly genera. The morphology of these sensilla is  
96 consistent with a mechanosensory function and does not indicate that they conduct signals  
97 related to olfaction, hygrometry, or temperature reception (McIver, 1975; Robertson and  
98 Patterson, 1982). These sensilla reside in areas where males' grasping appendages contact the  
99 female thorax before and during mating, which has led to speculation that they allow females

100 to evaluate male morphologies and discriminate conspecific from heterospecific males (Jurzitza,  
101 1974, 1975; Tennessen, 1975; Robertson and Paterson, 1982; Battin, 1993a, 1993b). Each  
102 mechanoreceptor is associated with a single sensory neuron (McIver, 1975; Kiel, 1997). The  
103 thoracic sensilla thus represent a spatial matrix that can transmit signals to the female central  
104 nervous system based on the pattern in which the sensilla are stimulated. Greater numbers of  
105 these receptors are expected to enhance a female's sensory resolution by increasing the  
106 combinatorial complexity of tactile signals that she can perceive. For example, if a female  
107 possesses 25 sensilla, and each sensillum has two response states ("on" if contacted and "off" if  
108 not contacted), then the number of unique tactile patterns that the female could distinguish is  
109  $2^{25} = 3.4 \times 10^7$ . A female that possesses just one additional sensillum would be able to  
110 distinguish among roughly twice as many tactile patterns ( $2^{26} = 6.7 \times 10^7$ ). Should individual  
111 sensilla respond to quantitative variation in touch (rather than a binary response), this would  
112 dramatically increase the number of response states and therefore further enhance tactile  
113 acuity (*e.g.*, Gaffin and Brayfield, 2017). Female damselfly thoracic sensilla thus present an  
114 external, quantifiable phenotype in which to investigate the mechanistic basis of tactile stimuli  
115 and female mating decisions.

116 The North American damselfly genus *Enallagma* includes several recently diverged  
117 species that often co-occur in the same habitats (Johnson and Crowley, 1980; McPeck, 1998),  
118 and do not engage in premating courtship (Fincke et al., 2007; Barnard et al., 2017) or use  
119 chemical cues for mate selection (Rebora et al., 2018). A female's first opportunity to assess a  
120 potential mate occurs when the male uses his terminal appendages to grasp the mesostigmal  
121 plates on the female thorax to form "tandem", the premating position. The male superior

122 grasping appendages (cerci) have species-specific morphologies, and differences in the  
123 morphology of these structures are the primary cause of RI in this genus (Paulson, 1974;  
124 Barnard et al., 2017). Two species, *E. anna* and *E. carunculatum*, occasionally hybridize in  
125 nature to produce males and females with reproductive structure morphologies that are  
126 intermediate to each of the pure species (Miller and Ivie, 1993; Donnelly, 2008; Johnson, 2009;  
127 Barnard et al., 2017). Females of both pure species discriminate strongly against both  
128 heterospecific and interspecific hybrid males that take them in tandem, which shows that  
129 female *E. anna* and *E. carunculatum* can detect not only large differences in male cercus  
130 morphologies, but also more subtle differences such as those that distinguish conspecific and  
131 hybrid males (Barnard et al., 2017).

132         Because it appears that mesostigmal sensilla mediate species recognition, they might be  
133 expected to show signs of reproductive character displacement (RCD): increased divergence of  
134 traits involved in RI in regions of sympatry between *E. anna* and *E. carunculatum* relative to  
135 regions of allopatry (Brown and Wilson, 1956; Howard, 1993; Pfennig and Pfennig, 2009). RCD  
136 can manifest phenotypically as divergence in either signaling traits or mate preferences, in  
137 which sympatric females display stronger discrimination against heterospecific males than do  
138 allopatric females of the same species (e.g., Gerhardt, 1994; Gabor and Ryam, 2001; Albert and  
139 Schluter, 2004; Wheatcroft and Qvarnstrom, 2017). This strengthening of preference in  
140 sympatry may evolve via direct selection on adult prezygotic phenotypes, or via reinforcement,  
141 where selection against interspecific hybrids gives rise to selection for enhanced premating  
142 isolation between species (Dobzhansky, 1937). *Enallagma anna* and *E. carunculatum* can  
143 interbreed, but their hybrids experience significantly reduced fitness (Barnard et al., 2017).

144 Female *Enallagma* experience frequent mating attempts from heterospecific males where both  
145 species co-occur (Paulson, 1974; Fincke et al., 2007; Barnard et al., 2017). These findings  
146 suggest that in sympatry, females may experience selection for stronger species discrimination  
147 ability. Studies of several *Enallagma* species (not including *E. anna* or *E. carunculatum*) have  
148 revealed that male cercus shape varies little among populations, even across large geographical  
149 regions (McPeck et al., 2011; Siepielski et al., 2018). *Enallagma anna* and *E. carunculatum*  
150 appear to show similar patterns, at least in the western part of their distributions (A. Barnard,  
151 unpublished data). It is possible, however, that females in sympatry with other species are  
152 more sensitive to variation among males than are females of the same species in regions of  
153 allopatry, and this variation in sensitivity may be reflected in female sensilla traits.

154         Here, we use sensilla number, density, and location as proxies for female preference, to  
155 test the hypothesis that variation in female sensilla phenotypes supports a function in species  
156 recognition. We tested this hypothesis by quantifying sensilla on the mesostigmal plates of a  
157 large set of *E. anna* and *E. carunculatum* females from multiple populations across the western  
158 United States and comparing phenotypes of each pure species from sympatric and allopatric  
159 populations to identify patterns consistent with RCD. We predicted that in sympatric  
160 populations, females would possess higher sensilla numbers, higher sensilla density, and/or  
161 different spatial distributions of sensilla within their mesostigmal plates when compared to  
162 females from allopatric populations.

163

## 164 **Materials and methods**

### 165 **Population sampling**



166 We measured the sensilla traits of 29 *E. anna* females across 13 populations, and 74 *E.*  
167 *carunculatum* females across 19 populations (Fig. 1, Table 1). We classified each population as  
168 allopatric, locally allopatric, or sympatric. Sympatric populations are those where *E. anna* and  
169 *E. carunculatum* co-occur temporally as well as spatially. Because *E. anna*'s geographic range  
170 falls completely within *E. carunculatum*'s range, only *E. carunculatum* has completely allopatric  
171 populations. We designated populations as locally allopatric at sites within the area of range  
172 overlap, but where only one species is known to occur based on occurrence data from  
173 OdonataCentral (Abbott, 2016). Although some specimens were collected as early as 1945, the  
174 majority of samples (82 of 103) we studied were collected between 2012 and 2016.

175

#### 176 **Trait imaging and quantification**

177 We photographed each damselfly using a Nikon D5100 camera (16.2 MP; Nikon  
178 Corporation, Tokyo, Japan). We dissected the ventral thoracic cuticle from each female using  
179 forceps and imaged the mesostigmal plates using scanning electron microscopy. Specimens  
180 were mounted on aluminum stubs with carbon tape, sputter-coated with gold-palladium, and  
181 imaged at, 200X magnification and 3kV using a Zeiss NEON scanning electron microscope.

182 To avoid any potential bias during measurements, we blind-coded image files before  
183 measuring all traits. We measured abdomen length (abdominal segments 1-10, excluding  
184 terminal appendages) on the full-body photos as an estimate for body size using the segmented  
185 line tool in ImageJ (Abramoff et al., 2004). We quantified sensilla traits on the right  
186 mesostigmal plate of each female damselfly unless the right plate was dirty or damaged, in  
187 which case we quantified the left plate (n = 20). Sensilla counts on a subset of 57 females

188 showed that left plate and right plate sensilla counts were highly correlated within individual  
189 females ( $r = 0.85$ ). In cases where we quantified the left plate, we flipped the image  
190 horizontally, so it was in the same orientation as a right plate. We standardized the position of  
191 the mesostigmal plate in each image by cropping and rotating the image so that the lower  
192 medial corner of the plate was in line with the lower left corner of each image. We counted  
193 sensilla and obtained their  $x$  and  $y$  coordinates in ImageJ using the multi-point selection tool.  
194 We traced an outline around the plate image, excluding the lateral carina (Fig. S1), using a  
195 Wacom Cintiq 12WX tablet and stylus (Wacom, Saitama, Japan) and the freehand selection tool  
196 in ImageJ. This procedure produced  $x$  and  $y$  coordinates that described the plate outline. We  
197 performed all measurements twice for each specimen. Measurements across the two technical  
198 replicates were highly correlated ( $r_{\text{abdomen}} = 0.95$ ,  $n = 78$ ;  $r_{\text{count}} = 0.95$ ,  $n = 103$ ;  $r_{\text{plate area}} = 0.99$ ,  $n$   
199  $= 86$ ), so we used the mean trait values of the two replicates in subsequent analyses.  
200 Seventeen samples were imaged at angles that allowed counting of the sensilla, but distorted  
201 the plate shape or distances between the sensilla. Those samples are included in analyses of  
202 sensilla number, but were not included in the analyses of sensilla density or distribution.

203

#### 204 **Sensilla trait analyses**

205 We conducted all morphometric and statistical analyses using R v. 3.4.1 (R Core Team,  
206 2015). We used the mesostigmal plate outline coordinates to calculate each plate's two-  
207 dimensional area. To calculate the area of the sensilla-covered region of each plate, we  
208 generated a polygon connecting the coordinates of the outermost sensilla and calculated the  
209 area within this outline. We determined the proportion of each plate that was covered by

210 sensilla by dividing the sensilla area by total plate area. We calculated sensilla density in two  
211 ways. First, we divided sensilla number by the area of the sensilla-covered region. This  
212 measures the number of sensilla that occur in a particular area, but does not capture the  
213 relative arrangement of sensilla within that area. Second, we computed the nearest neighbor  
214 distances among all sensilla within each plate based on their  $x$  and  $y$  coordinates and then  
215 calculated the mean and median nearest neighbor distances between the sensilla for each  
216 female. Nearest neighbor mean and median distances were highly correlated ( $r_{E. carunculatum} =$   
217  $0.83$ ;  $r_{E. anna} = 0.81$ ), so we used the mean values for these measures in our analyses.

218 To determine whether larger females possess more sensilla, we regressed sensilla  
219 number against abdomen length. We found no significant relationship between these traits in  
220 either species ( $E. anna$ :  $R^2_{\text{adj}} = -0.007$ ,  $F_{1,25} = 0.82$ ,  $P = 0.737$ ;  $E. carunculatum$ :  $R^2_{\text{adj}} = 0.01$ ,  $F_{1,48} =$   
221  $0.52$ ,  $P = 0.47$ ). We thus present the results that compare sensilla counts without correcting for  
222 differences in body size.

223

## 224 **Sensilla spatial analyses**

225 To quantify sensilla distributions within each plate, we generated kernel density  
226 estimates (KDEs) for populations with at least four sampled individuals (two  $E. anna$  and six  $E.$   
227  $carunculatum$  populations) using the R package `ks` (Duong, 2016). First, we randomly selected  
228 one of the two replicate sets of sensilla and plate outline coordinates for each female. To  
229 prepare the coordinate data for KDE analyses, we concatenated the sensilla and plate  
230 coordinates for each female and adjusted all plate outlines to have an area of one. This  
231 standardized each set of sensilla coordinates for size, while maintaining their relative positions

232 within each plate. Next, we translated each set of coordinates to place the origin of the  
233 coordinate system at the plate outline's centroid. We concatenated sensilla coordinates for all  
234 females sampled within each population to compute a representative KDE for each population.

235         Within each species, we conducted pairwise tests to compare each population's KDE  
236 against every other population using the function `kde.test` with the default settings. This test  
237 returns a *P*-value that reflects the probability of generating the two respective KDEs from the  
238 same distribution of points. Because we performed multiple pairwise tests among *E.*  
239 *carunculatum* populations, we adjusted the resulting *P*-values using the false discovery rate  
240 (Benjamini & Hochberg, 1995).

241         We generated an average plate outline for each population on which to visualize the  
242 KDEs. The total number of coordinates that describe each plate outline varied among females,  
243 ranging from 647-1078 for *E. anna* and 688-1028 for *E. carunculatum*. We standardized the  
244 number of coordinates representing each plate by retaining the points for each of the upper  
245 and lower medial corners and randomly sampled 198 points in between. We then treated each  
246 of these, 200 points as landmarks (the corners represented fixed landmarks and the remaining  
247 points were designated as sliding semilandmarks) and used the R package `geomorph` (Adams  
248 and Otarola-Castillo, 2013) to perform general Procrustes analysis (Rohlf, 1999) and obtain an  
249 average two-dimensional plate shape for each population.

250

## 251 **Statistical analyses**

252         Some populations were well-sampled whereas others were represented by a single  
253 female (Table 1). To avoid pseudoreplication, for each population with  $N > 1$ , our analyses of

254 sensilla number, density, and area of each mesostigmal plate covered by sensilla used the  
255 population mean of each trait value, so that each population was represented by a single  
256 measurement. We arcsin transformed proportion data prior to analysis. To compare traits  
257 between *E. anna* and *E. carunculatum*, we used Welch's *t*-tests. We compared traits among  
258 sympatric, locally allopatric, and fully allopatric *E. carunculatum* populations using Kruskal-  
259 Wallis tests, and between sympatric and locally allopatric *E. anna* populations using Welch's *t*-  
260 tests. To understand the relationships between sensilla number, sensilla density, and the area  
261 of the plate occupied by sensilla, we performed linear regressions between each pair of traits.  
262 Due to the limitation of single samples from some populations, we analyzed *E. carunculatum*  
263 populations in two ways: we first included all samples, then conducted a separate analysis that  
264 excluded populations with  $N < 4$ . Both analyses yield similar results; we report the results for  
265 the analysis using all samples in the main text and provide results from the subset of samples  
266 with  $N \geq 4$  in the supplemental material (Table S1).

267

## 268 **Results**

### 269 ***Enallagma anna* and *E. carunculatum* females possess distinct sensilla traits**

270 *Enallagma anna* females possessed significantly more sensilla per plate ( $\bar{x} = 49 \pm 2$ ) than  
271 *E. carunculatum* females ( $\bar{x} = 28 \pm 1$ ,  $t_{35.1} = 11.13$ ,  $P = 4.6 \times 10^{-13}$ ; Fig. 2A). *Enallagma anna*  
272 females also possessed sensilla distributed over a larger proportion of each plate ( $t_{39.7} = 11.1$ ,  $P$   
273  $= 8.6 \times 10^{-14}$ ; Fig. 2B), and larger mean distances between sensilla ( $t_{54} = 6.7$ ,  $P = 1.3 \times 10^{-8}$ ; Fig.  
274 2C). This ultimately results in a lower density of sensilla per unit area in *E. anna* compared to *E.*  
275 *carunculatum* ( $t_{99.6} = -12.96$ ,  $P = 2.2 \times 10^{-16}$ ; Fig. 2D). The sensilla also occurred in different

276 locations on the mesostigmal plates of each species: they were more medially located in *E.*  
277 *anna* and more laterally located in *E. carunculatum* (Figs. 3, 4).

278 Both species showed a strong positive relationship between sensilla number and the  
279 absolute area of the plate occupied by sensilla (*E. anna*:  $R^2_{\text{adj}} = 0.33$ ,  $F_{1,27} = 14.71$ ,  $P = 0.0007$ ; *E.*  
280 *carunculatum*:  $R^2_{\text{adj}} = 0.33$ ,  $F_{1,72} = 37.68$ ,  $P = 4.1 \times 10^{-8}$ ). Consistent with this result, linear  
281 regressions also revealed that females with more sensilla also had a larger proportion of the  
282 plate occupied by sensilla (*E. anna*:  $R^2_{\text{adj}} = 0.26$ ,  $F_{1,27} = 10.65$ ,  $P = 0.003$ ; *E. carunculatum*:  $R^2_{\text{adj}} =$   
283  $0.20$ ,  $F_{1,65} = 18.93$ ,  $P = 4.4 \times 10^{-5}$ ). Females with more sensilla had smaller mean distances  
284 between neighboring sensilla (*E. anna*:  $R^2_{\text{adj}} = 0.11$ ,  $F_{1,27} = 4.34$ ,  $P = 0.046$ ; *E. carunculatum*:  $R^2_{\text{adj}}$   
285  $= 0.09$ ,  $F_{1,72} = 3.80$ ,  $P = 0.01$ ). Overall, these results show that a greater number of sensilla was  
286 more strongly associated with a sensilla distribution that covers a larger area of the  
287 mesostigmal plate rather than a greater concentration sensilla within in a smaller area.

288

289 ***E. carunculatum* sensilla traits do not show a strong pattern of reproductive character**  
290 **displacement**

291 We made several non-mutually exclusive predictions expected under RCD for the  
292 sensilla traits we measured in sympatric populations relative to allopatric populations. In  
293 particular, we predicted to observe at least one of the following phenotypic differences in  
294 sympatric females relative to allopatric females: (1) more numerous sensilla, (2) denser sensilla,  
295 (3) sensilla concentrated in different *E.* regions of the mesostigmal plates. We did not find  
296 significant differences in any of these traits between sympatric and locally allopatric *E. anna*  
297 females (Table 2). However, because our *E. anna* samples included only four females from

298 three locally allopatric populations, we could not perform a robust comparison of *E. anna*  
299 sensilla traits between populations that do, or do not encounter *E. carunculatum*. We thus  
300 focus our analysis on comparisons between sympatric and allopatric *E. carunculatum*  
301 populations, for which we had larger sample sizes.

302 Sympatric, locally allopatric, and fully allopatric *E. carunculatum* populations did not  
303 differ significantly from one another in sensilla number (Kruskal-Wallis  $\chi^2_2 = 0.69$ ,  $P = 0.71$ ),  
304 proportion of the mesostigmal plate covered by sensilla (Kruskal-Wallis  $\chi^2_2 = 2.16$ ,  $P = 0.34$ ), or  
305 sensilla density (overall density: Kruskal-Wallis  $\chi^2_2 = 0.12$ ,  $P = 0.94$ ; mean distance between  
306 sensilla: Kruskal-Wallis  $\chi^2_2 = 3.53$ ,  $P = 0.17$ ). In addition to divergence of mean trait values, RCD  
307 can also result in reduced trait variance in sympatry without affecting the mean (Pfennig and  
308 Pfennig 2009). Sympatric *E. carunculatum* populations displayed less interpopulation variance  
309 than allopatric populations in both mean sensilla number (Figure 2A) and mean proportion of  
310 the plate covered by sensilla (Figure 2B). However, these trends were not statistically  
311 significant (sensilla number: Bartlett's  $K^2_1 = 0.83$ ,  $P = 0.36$ ; proportion of plate covered by  
312 sensilla: Bartlett's  $K^2_1 = 1.86$   $P = 0.17$ ).

313 Interestingly, although mean trait values did not differ significantly between sympatric  
314 and allopatric populations, sensilla traits displayed considerable variation within the  
315 populations we sampled. For example, within a single population, a particular female might  
316 have twice as many sensilla than another female (Fig. 3). This pattern was also observed in the  
317 *E. anna* populations we studied.

318 KDE comparisons did not reveal significant differences in sensilla distributions between  
319 sympatric and allopatric *E. carunculatum* populations (Table 3). However, the analysis revealed

320 significant differences in sensilla distributions between several pairs of allopatric *E.*  
321 *carunculatum* populations (Fig. 4E), which indicates that populations isolated from *E. anna* vary  
322 more among themselves than do populations sympatric with *E. anna*, which share similar  
323 sensilla patterns. This result is consistent with those described above that indicated higher  
324 variance in sensilla traits among allopatric populations compared to sympatric populations.

325

## 326 **Discussion**

327 *Enallagma anna* and *E. carunculatum* females possess different numbers of sensilla in  
328 species-specific distributions on their mesostigmal plates. This result supports the idea that  
329 receptors that receive male stimuli will occur in patterns that correspond to the male organs  
330 during contact (Eberhard, 2010). An association between male morphology and female sensilla  
331 has been described for African *Enallagma* species (Robertson and Paterson, 1982), and our  
332 results show a similar pattern for two North American species. *Enallagma anna* male cerci are  
333 considerably larger than *E. carunculatum* cerci, and the observation that *E. anna* females had a  
334 larger number of sensilla compared to *E. carunculatum* females is consistent with the likelihood  
335 that *E. anna* male cerci make greater spatial contact with the mesostigmal plates.

336 When species make secondary contact after initial divergence in allopatry, the possible  
337 outcomes are increased species divergence (*e.g.*, Sætre et al., 1997; Noor, 2000; Naisbit et al.,  
338 2001; Yukilevich, 2012; Dyer et al., 2014), decreased species divergence (*e.g.*, Ritchie et al.,  
339 1989; Shurtliff et al., 2013; Yang et al., 2016), local extinction of one species due to  
340 reproductive exclusion (Hochkirch et al., 2007, Groning and Hochkirch, 2008), or no change in  
341 either direction (Abbott et al., 2013). Because *E. anna* and *E. carunculatum* produce



342 reproductively disadvantaged hybrids (Barnard et al., 2017), selection is expected to favor  
343 increased premating isolation when the species are sympatric. Within each species, we  
344 predicted that female sensilla traits in sympatric populations would diverge from those of  
345 allopatric populations indicative of a shift in female preferences to avoid mating with  
346 heterospecifics. Contrary to this prediction, sympatric and allopatric *E. carunculatum*  
347 populations were not significantly different in mean sensilla trait values (Fig. 2) or sensilla  
348 density distributions (Fig. 4E).

349         Although we observed a trend toward more sensilla in sympatric *E. anna* populations  
350 relative to allopatric populations (Figs. 2A, 3A), it is difficult to conduct a robust comparison for  
351 this species because *E. anna*'s entire geographic range overlaps with *E. carunculatum*'s range  
352 and *E. anna* are often relatively rare (Acorn, 2004; A. Barnard, personal obs.). It was therefore  
353 difficult to collect sufficient *E. anna* samples from populations that do not co-occur with *E.*  
354 *carunculatum*. We might, however, expect a stronger pattern of RCD in sympatric *E. anna*  
355 females because *E. carunculatum* males can take them in tandem relatively easily, whereas *E.*  
356 *anna* males are typically unsuccessful at taking *E. carunculatum* females in tandem (Barnard et  
357 al., 2017). This means that *E. anna* females may have more opportunities for mating mistakes  
358 than *E. carunculatum* females, which can result in stronger asymmetric RCD (Lemmon, 2009;  
359 Pfennig and Pfennig, 2009).

360         There are at least three potential explanations for the absence of RCD in the form of  
361 significant differences in the sensilla traits we measured between sympatric and allopatric  
362 populations of *E. carunculatum*. First, species-specific sensilla distributions may be sufficiently  
363 different to allow females to recognize when they are taken in tandem by heterospecific or

364 conspecific males. If this is true, small degrees of variation within the overall species pattern  
365 among females might not affect females' species-recognition abilities. Indeed, a recent study  
366 found that intraspecific variation in male cercus morphology appears too minor for *Enallagma*  
367 females to show strong discrimination among conspecific males that grasp them (Siepielski et  
368 al., 2018). Although RCD is most easily facilitated when the trait under selection already differs  
369 between species (Pfennig and Pfennig, 2009), these sensilla traits may have already diverged  
370 sufficiently enough to preclude strong selection on further divergence.

371         Second, it is possible that the external sensilla phenotypes we measured are not  
372 representative of proximate female sensory traits, and the variation that directs mating  
373 decisions occurs within the female nervous system. For example, individual sensilla might differ  
374 in response rate or ability to distinguish different levels of pressure applied by the cerci and  
375 grasping pressure might differ between males of each species. The direction of mechanosensor  
376 deflection is also important for stimulus detection (Keil, 1997), and different species' cercus  
377 morphologies may contact sensilla from different angles. Female mate preferences may also be  
378 influenced by the relative frequencies with which females encounter heterospecific and  
379 conspecific males and female sexual experience (*e.g.*, Svensson et al., 2014).

380         Finally, although we did not detect a statistically significant difference between group  
381 means, the small differences we observed may still have biological relevance. If gaining just  
382 one additional mechanosensor can (at least) double a female's tactile discriminatory power  
383 (Gaffin and Brayfield, 2017), then females in a population with a seemingly minor upward shift  
384 in sensilla number could gain a substantial increase in their ability to detect and avoid mating  
385 with heterospecifics. Similarly, it is difficult to determine the features of sensilla density

386 distributions that may influence female preference solely by conducting statistical tests  
387 between KDEs. Small spatial differences within largely similar patterns may not contribute a  
388 signal large enough to be captured in a statistical test, but still reflect salient variation in the  
389 way females receive tactile stimuli. This might include three dimensional spatial differences  
390 that we were unable to measure here.

391         These possible explanations highlight the interesting avenues that female damselfly  
392 sensilla provide for investigating the mechanisms underlying how females evaluate male tactile  
393 signals to make mating decisions. The ability to quantify the number and locations of female  
394 mechanoreceptors in a region contacted by male reproductive structures complements our  
395 understanding of patterns of variation in male morphologies (McPeck et al., 2008; McPeck et  
396 al., 2009; McPeck et al., 2011; Barnard et al., 2017). Females of both species display substantial  
397 intrapopulation variation in sensilla traits (Fig. 3) and this variation may play a role in sexual  
398 selection and female preferences within species. Behavioral studies will be crucial to link  
399 mechanoreceptor phenotypes to female mating decisions and clarify how sensilla traits  
400 influence both species recognition and sexual selection. For example, do females with more  
401 sensilla make fewer mating mistakes than females with fewer sensilla (Lemmon, 2009)?  
402 Another outstanding question of this system is how the cerci stimulate individual sensilla during  
403 tandem. This might be determined by flash-freezing male-female tandem pairs and using  
404 micro-CT scanning to understand how the male and female structures interact, similar to a  
405 recent approach used in seed beetles (Dougherty and Simmons, 2017). Once we understand  
406 how cerci contact the sensilla, functional tests of sensilla electrophysiology could reveal how

407 individual sensilla respond to stimulation and indicate whether certain sensilla make greater  
408 contributions to reproductive decision-making than others.

409 Female preference can drive sexual selection, promote trait divergence, and cause RI  
410 between species (Ritchie, 1996). A longstanding presumption in the literature on genital  
411 evolution and speciation has been that female reproductive morphologies are less variant or  
412 species-specific than male genitalia (reviewed in Shapiro and Porter, 1989). However, recent  
413 studies of variation in female reproductive structures suggest that variation does exist among  
414 individuals and species (Ah-King et al., 2014), and our data highlight the importance of looking  
415 beyond the easily-quantified external morphologies. When male reproductive structure  
416 morphologies are obviously divergent, but female morphologies are not, females may possess  
417 important variation at neurophysiological levels that affects how they evaluate male tactile  
418 signals, similar to the way females evaluate signals in other sensory modalities.

419

#### 420 **Acknowledgements**

421 We are grateful to P. Larson for SEM imaging help. We thank O. Fincke, D. Paulson, and B.  
422 Mauffray for generously donating damselfly specimens, and D. Gaffin, O. Fincke, R. Knapp, G.  
423 Wellborn, and S. Westrop for helpful discussion during the course of this work. This work was  
424 supported by funds from the University of Oklahoma to JPM and AAB. The authors declare that  
425 there is no conflict of interest regarding the publication of this article.

426

#### 427 **References cited**

- 428 Abramoff, M. D., Magalhaes, P. J. & Ram, S. J., 2004. Image processing with ImageJ. *Biophotonics*  
429 *International* **11**: 36-42.
- 430 Acorn, J., 2004. *Damselflies of Alberta: Flying Neon Toothpicks in the Grass*. The University of Alberta  
431 Press, Edmonton, Alberta, Canada.
- 432 Albert, A. Y. K. & Schluter, D., 2004. Reproductive character displacement of male stickleback mate  
433 preference: reinforcement or direct selection? *Evolution* **58**: 1099-1107.
- 434 Barnard, A. A., Fincke, O. M., McPeck, M. A. & Masly, J. P., 2017. Mechanical and tactile  
435 incompatibilities cause reproductive isolation between two young damselfly species. *Evolution*  
436 **71**: 2410–2427.
- 437 Battin, T. J., 1993. Revision of the puella group of the genus *Coenagrion* Kirby, 1890 (Odonata,  
438 Zygoptera), with emphasis on morphologies contributing to reproductive isolation.  
439 *Hydrobiologia* **262**: 13-29.
- 440 Battin, T. J., 1993. The odonate mating system, communication, and sexual selection: A review. *Bulletin*  
441 *of Zoology* **60**: 353-360.
- 442 Boughman, J. W., Rundle, H. D. & Schluter, D., 2005. Parallel evolution of sexual isolation in  
443 sticklebacks. *Evolution* **59**: 361-373.
- 444 Briceño, R., Eberhard, W. & Robinson, A., 2007. Copulation behaviour of *Glossina pallidipes* (Diptera:  
445 Muscidae) outside and inside the female, with a discussion of genitalic evolution. *Bulletin of*  
446 *Entomological Research* **97**: 471-488.
- 447 Briceño, R. D. & Eberhard, W. G., 2009. Experimental demonstration of possible cryptic female choice  
448 on male tsetse fly genitalia. *Journal of Insect Physiology* **55**: 989-96.

- 449 Briceño, R. D. & Eberhard, W. G., 2009. Experimental modifications imply a stimulatory function for  
450 male tsetse fly genitalia, supporting cryptic female choice theory. *Journal of Evolutionary*  
451 *Biology* **22**: 1516-1525.
- 452 Brown, W. L. & Wilson, E. O., 1956. Character displacement. *Systematic Zoology* **5**: 49-64.
- 453 Coleman, S. W., 2008. Taxonomic and sensory biases in the mate-choice literature: there are far too  
454 few studies of chemical and multimodal communication. *Acta Ethologica* **12**: 45-48.
- 455 Corbet, P. S., 1999. *Dragonflies: Behaviour and Ecology of Odonata*. Cornell University Press, Ithaca,  
456 NY.
- 457 Córdoba-Aguilar, A., 1999. Male copulatory sensory stimulation induces female ejection of rival  
458 sperm in a damselfly. *Proceedings of the Royal Society of London B: Biological Sciences*  
459 **266**: 779-784.
- 460 Córdoba-Aguilar, A., 2002. Sensory trap as the mechanism of sexual selection in a damselfly  
461 genitalic trait (Insecta: Calopterygidae). *The American Naturalist* **160**: 594-601.
- 462 Córdoba-Aguilar, A., 2005. Possible coevolution of male and female genital form and function in a  
463 calopterygid damselfly. *Journal of Evolutionary Biology* **18**: 132-7.
- 464 Costanzo, K. & Monteiro, A., 2007. The use of chemical and visual cues in female choice in the butterfly  
465 *Bicyclus anynana*. *Proceedings of the Royal Society of London B: Biological Sciences* **274**: 845-  
466 851.
- 467 Coyne, J. A., 1993. The genetics of an isolating mechanism between two sibling species of *Drosophila*.  
468 *Evolution* **47**: 778-788.
- 469 Coyne, J. A., Crittenden, A. & Mahi, K., 1994. Genetics of a pheromonal difference contributing to  
470 reproductive isolation in *Drosophila*. *Science* **265**: 1461-1464.

- 471 Coyne, J. A. & Orr, H. A., 2004. *Speciation*. Sinauer Associates, Sunderland, MA.
- 472 Donnelly, N. T., 2008. A hybrid complex in *Enallagma. Argia*, 20: 10-11.
- 473 Dopman, E. B., Robbins, P. S. & Seaman, A., 2010. Components of reproductive isolation between  
474 North American pheromone strains of the European corn borer. *Evolution* **64**: 881-902.
- 475 Dougherty, L. R. & Simmons, L. W., 2017. X-ray micro-CT scanning reveals temporal separation of male  
476 harm and female kicking during traumatic mating in seed beetles. *Proceedings of the Royal  
477 Society of London B: Biological Sciences* **284**., 20170550.
- 478 Dufour, L. 1844. Anatomie générale des diptères. *Annales des Sciences Naturelles* **1**: 244-264.
- 479 Duong, T. (2016) ks: Kernel Smoothing. pp. R package version 1.10.4.
- 480 Dyer, K. A., White, B. E., Sztepanacz, J. L., Bewick, E. R. & Rundle, H. D., 2014. Reproductive character  
481 displacement of epicuticular compounds and their contribution to mate choice in *Drosophila  
482 subquinaria* and *Drosophila recens*. *Evolution* **68**: 1163-1175.
- 483 Eberhard, W. G., 1985. *Sexual selection and animal genitalia*. Harvard University Press, Cambridge, MA.
- 484 Eberhard, W. G., 1992. Species isolation, genital mechanics, and the evolution of species-specific  
485 genitalia in three species of *Macrodactylus* beetles (Coleoptera, Scarabeidae, Melolonthinae).  
486 *Evolution* **46**: 1774-1783.
- 487 Eberhard, W. G., 1994. Evidence for widespread courtship during copulation in 131 species of insects  
488 and spiders, and implications for cryptic female choice. *Evolution* **48**: 711-733.
- 489 Eberhard, W. G., 1996. *Female control: sexual selection by cryptic female choice*. Princeton University  
490 Press, Princeton, NJ.
- 491 Eberhard, W. G., 2001. The functional morphology of species-specific clasping structures on the front  
492 legs of male sepsid flies. *Zoological Journal of the Linnean Society* **133**: 335–368.

- 493 Eberhard, W. G., 2002. Physical restraint or stimulation? The function(s) of the modified front legs of  
494 male *Archisepsis diversiformis* (Diptera, Sepsidae). *Journal of Insect Behavior* **15**: 831-850.
- 495 Eberhard, W. G., 2010. Evolution of genitalia: theories, evidence, and new directions. *Genetica* **138**: 5-  
496 18.
- 497 Edvardsson, M. & Göran, A., 2000. Copulatory courtship and cryptic female choice in red flour beetles  
498 *Tribolium castaneum*. *Proceedings of the Royal Society of London B: Biological Sciences* **267**:  
499 559-563.
- 500 Ewing, A. W. & Bennet-Clark, H., 1968. The courtship songs of *Drosophila*. *Behaviour* **31**: 288-301.
- 501 Fincke, O. M., Fargevieille, A. & Schultz, T. D., 2007. Lack of innate preference for morph and species  
502 identity in mate-searching *Enallagma* damselflies. *Behavioral Ecology and Sociobiology* **61**:  
503 1121-1131.
- 504 Gabor, C. & Ryam, M., 2001. Geographical variation in reproductive character displacement in mate  
505 choice by male sailfin mollies. *Proceedings of the Royal Society of London B: Biological Sciences*  
506 **268**: 1063-1070.
- 507 Gaffin, D. & Brayfield, B., 2017. Exploring the chemo-textural familiarity hypothesis for scorpion  
508 navigation. *Journal of Arachnology* **45**: 265-270.
- 509 Garneau, N. L., Nuessle, T. M., Sloan, M. M., Santorico, S. A., Coughlin, B. C. & Hayes, J. E., 2014.  
510 Crowdsourcing taste research: genetic and phenotypic predictors of bitter taste perception as a  
511 model. *Frontiers in Integrative Neuroscience* **8**: 1662-5145.
- 512 Gerhardt, H. C., 1994. Reproductive character displacement of female mate choice in the grey treefrog,  
513 *Hyla chrysoscelis*. *Animal Behaviour* **47**: 959-969.



- 514 Gerhardt, H. C. & Huber, F., 2002. *Acoustic Communication in Insects and Anurans: Common Problems*  
515 *and Diverse Solutions*. University of Chicago Press, Chicago, IL.
- 516 Girard, M. B., Elias, D. O. & Kasumovic, M. M., 2015. Female preference for multi-modal courtship:  
517 multiple signals are important for male mating success in peacock spiders. *Proceedings of the*  
518 *Royal Society of London B: Biological Sciences* **282**.
- 519 Howard, D. J. (1993) Reinforcement: origin, dynamics, and fate of an evolutionary hypothesis. In:  
520 *Hybrid Zones and the Evolutionary Process*, (Harrison, R. G., ed.). pp. 46–69. Oxford University  
521 Press, New York.
- 522 Ingram, K. K., Laamanen, T., Puniamoorthy, N. & Meier, R., 2008. Lack of morphological coevolution  
523 between male forelegs and female wings in *Themira* (Sepsidae: Diptera: Insecta). *Biological*  
524 *Journal of the Linnean Society* **93**: 227-238.
- 525 Jiggins, C. D., Naisbit, R. E., Coe, R. L. & Mallet, J., 2001. Reproductive isolation caused by colour  
526 pattern mimicry. *Nature* **411**: 302–305.
- 527 Johnson, D. M. & Crowley, P. H., 1980. Habitat and seasonal segregation among coexisting odonate  
528 larvae. *Odonatologica* **9**: 297–308.
- 529 Johnson, J., 2009. Presumed *Enallagma anna* Williamson × *carunculatum* Morse hybrids from Oregon  
530 and California. *Bulletin of American Odonatology* **11**: 8-10.
- 531 Jurzitza, G., 1974. Rasterelektronenmikroskopische Untersuchungen des Zangen- griffes und der  
532 Laminae mesostigmales einiger Coenagrionidae (Odonata, Zygoptera). *Forma Functio* **7**: 377-  
533 392.
- 534 Jurzitza, G., 1975. Rasterelektronenmikroskopische Untersuchungen an den Appendices und den  
535 Laminae mesostigmales einiger *Enallagma*-Arten (Odonata. Zygoptera). *Forma Functio* **8**: 33-48.

- 536 Kamimura, Y. & Mitsumoto, H., 2011. Comparative copulation anatomy of the *Drosophila*  
537 *melanogaster* species complex (Diptera: Drosophilidae). *Entomological Science* **14**: 399-410.
- 538 Keil, T. A., 1997. Functional morphology of insect mechanoreceptors. *Microscopy Research and*  
539 *Technique* **39**: 506–531.
- 540 Krieger, F. & Krieger-Loibl, E., 1958. Beiträge zum Verhalten von *Ischnura elegans* und *Ischnura pumilio*  
541 (Odonata) 1. *Zeitschrift für Tierpsychologie* **15**: 82-93.
- 542 Kronforst, M. R., Young, L. G., Kapan, D. D., McNeely, C., O'Neill, R. J. & Gilbert, L. E., 2006. Linkage of  
543 butterfly mate preference and wing color preference cue at the genomic location of wingless.  
544 *Proceedings of the National Academy of Sciences USA* **103**: 6575-80.
- 545 Loibl, E., 1958. Zur Ethologie und Biologie der deutschen Lestiden (Odonata) 1. *Zeitschrift für*  
546 *Tierpsychologie* **15**: 54-81.
- 547 Lorkovic, Z., 1958. Some peculiarities of spatially and sexually restricted gene exchange in the *Erebia*  
548 *tyndarus* group. *Cold Spring Harbor Symposia on Quantitative Biology* **23**: 319–325.
- 549 Masly, J. P., 2012. 170 Years of "Lock-and-Key": Genital morphology and reproductive isolation.  
550 *International Journal of Evolutionary Biolog*, **2012**: 247352.
- 551 Mayr, E., 1942. *Systematics and the Origin of Species, from the Viewpoint of a Zoologist*. Harvard  
552 University Press, Cambridge, MA.
- 553 Mclver, S. B., 1975. Structure of cuticular mechanoreceptors of arthropods. *Annual Review of*  
554 *Entomology*, **20**: 381-397.
- 555 McMillan, W. O., Jiggins, C. & Mallet, J., 1997. What initiates speciation in passion-vine butterflies?  
556 *Proceedings of the National Academy of Sciences USA* **94**: 8628–8633.

- 557 McPeck, M. A., 1998. The consequences of changing the top predator in a food web: a comparative  
558 experimental approach. *Ecological Monographs* **68**: 1-23.
- 559 McPeck, M. A., Shen, L. & Farid, H., 2009. The correlated evolution of three-dimensional reproductive  
560 structures between male and female damselflies. *Evolution* **63**: 73-83.
- 561 McPeck, M. A., Shen, L., Torrey, J. Z. & Farid, H., 2008. The tempo and mode of three-dimensional  
562 morphological evolution in male reproductive structures. *The American Naturalist* **171**: E158-  
563 78.
- 564 McPeck, M. A., Symes, L. B., Zong, D. M. & McPeck, C. L., 2011. Species recognition and patterns of  
565 population variation in the reproductive structures of a damselfly genus. *Evolution* **65**: 419-28.
- 566 Mendelson, T. C. & Shaw, K. L., 2012. The (mis) concept of species recognition. *Trends in Ecology &*  
567 *Evolution* **27**: 421-427.
- 568 Mendelson, T. C. & Wallis, G., 2003. Sexual isolation evolves faster than hybrid inviability in a diverse  
569 and sexually dimorphic genus of fish (Percidae: *Etheostoma*). *Evolution* **57**: 317-327.
- 570 Myers, S. S., Buckley, T. R. & Holwell, G. I., 2016. Male genital claspers influence female mate  
571 acceptance in the stick insect *Clitarchus hookeri*. *Behavioral Ecology and Sociobiology* **70**: 1547-  
572 1556.
- 573 Noor, M. & Coyne, J. A., 1996. Genetics of a difference in cuticular hydrocarbons between *Drosophila*  
574 *pseudoobscura* and *D. persimilis*. *Genetics Research* **68**: 117-123.
- 575 Noor, M. F., 2000. On the evolution of female mating preferences as pleiotropic byproducts of adaptive  
576 evolution. *Adaptive Behavior* **8**: 3-12.
- 577 Patterson, B. D. & Thaler Jr, C. S., 1982. The mammalian baculum: hypotheses on the nature of  
578 bacular variability. *Journal of Mammalogy* **63**: 1-15.

- 579 Paulson, D., 2009. *Dragonflies and Damselflies of the West*. Princeton University Press, Princeton, New  
580 Jersey.
- 581 Paulson, D. R., 2011. *Dragonflies and Damselflies of the East*. Princeton University Press, Princeton,  
582 New Jersey.
- 583 Pfennig, D. W. & Pfennig, K. S., 2010. Character Displacement and the Origins of Diversity. *The*  
584 *American Naturalist* **176**: S26-S44.
- 585 Pfennig, K. & Pfennig, D., 2009. Character displacement: ecological and reproductive responses to a  
586 common evolutionary problem. *Quarterly Review of Biology* **84**: 253-276.
- 587 Plath, M., Parzefall, J., Körner, K. E. & Schlupp, I., 2004. Sexual selection in darkness? Female mating  
588 preferences in surface-and cave-dwelling Atlantic mollies, *Poecilia mexicana* (Poeciliidae,  
589 Teleostei). *Behavioral Ecology and Sociobiology* **55**: 596-601.
- 590 Plath, M., Wiedemann, K. & Parzefall, J., 2004. Cave molly males (*Poecilia mexicana*) do not recognize  
591 receptive females without body contact. *Natura Croatica* **13**:, 197-200.
- 592 Price, T. D. & Bouvier, M. M., 2002. The evolution of F1 postzygotic incompatibilities in birds. *Evolution*  
593 **56**:, 2083-2089.
- 594 Rafferty, N. E. & Boughman, J. W., 2006. Olfactory mate recognition in a sympatric species pair of  
595 three-spined sticklebacks. *Behavioral Ecology* **17**: 965-970.
- 596 Reborá, M., Frati, F., Piersanti, S., Salerno, G., Selvaggini, R. & Fincke, O. M., 2018. Field tests of  
597 multiple sensory cues in sex recognition and harassment of a colour polymorphic damselfly.  
598 *Animal Behaviour* **136**: 127-136.
- 599 Richards, O. W. & Robson, G. C., 1926. The species problem and evolution. *Nature* **117**: 345-347.

- 600 Ritchie, M. G., Butlin, R. K. & Hewitt, G. M., 1989. Assortative mating across a hybrid zone in  
601 *Chorthippus parallelus* (Orthoptera: Acrididae). *Journal of Evolutionary Biology* **2**: 339–352.
- 602 Robertson, H. M. & Paterson, H. E. H., 1982. Mate recognition and mechanical isolation in *Enallagma*  
603 damselflies (Odonata: Coenagrionidae). *Evolution* **36**: 243-250.
- 604 Rohlf, F. J., 1999. Shape statistics: Procrustes superimpositions and tangent spaces. *Journal of*  
605 *Classification* **16**:, 197-223.
- 606 Rüschenbaum, S. & Schlupp, I., 2013. Non-visual mate choice ability in a cavefish (*Poecilia mexicana*) is  
607 not mechanosensory. *Ethology* **119**: 368-376.
- 608 Sætre, G.-P., Moum, T., Bureš, S., Král, M., Adamjan, M. & Moreno, J., 1997. A sexually selected  
609 character displacement in flycatchers reinforces premating isolation. *Nature* **387**: 589-592.
- 610 Sánchez-Guillén, R. A., Wellenreuther, M. & Cordero Rivera, A., 2012. Strong asymmetry in the relative  
611 strengths of prezygotic and postzygotic barriers between two damselfly sister species. *Evolution*  
612 **66**: 690-707.
- 613 Shapiro, A. M. & Porter, A. H., 1989. The lock-and-key hypothesis: Evolutionary and biosystematic  
614 interpretation of insect genitalia. *Annual Review of Entomology* **34**: 321-45.
- 615 Shaw, K. L., 2000. Interspecific genetics of mate recognition: inheritance of female acoustic preference  
616 in Hawaiian crickets. *Evolution* **54**: 1303–1312.
- 617 Shurtliff, Q. R., Murphy, P. J., Yeiter, J. D. & Matocq, M. D., 2013. Experimental evidence for  
618 asymmetric mate preference and aggression: behavioral interactions in a woodrat (*Neotoma*)  
619 hybrid zone. *BMC Evolutionary Biology* **13**: 220-233.

- 620 Siepielski, A. M., McPeck, S. J. and McPeck, M. A., 2018, Female mate preferences on high dimensional  
621 shape variation for male species recognition traits. *Journal of Evolutionary Biology*. Accepted  
622 Author Manuscript. doi:[10.1111/jeb.13302](https://doi.org/10.1111/jeb.13302)
- 623 Simmons, L. W., 2014. Sexual selection and genital evolution. *Austral Entomology* **53**: 1-17.
- 624 Stratton, G. E. & Uetz, G. W., 1986. The inheritance of courtship behavior and Its role as a reproductive  
625 isolating mechanism in two species of *Schizocosa* wolf spiders (Araneae; Lycosidae). *Evolution*  
626 **40**: 129-141.
- 627 Svensson, E. I., Runemark, A., Verzijden, M. N. & Wellenreuther, M., 2014. Sex differences in  
628 developmental plasticity and canalization shape population divergence in mate preferences.  
629 *Proceedings of the Royal Society of London B: Biological Sciences* **281**: 1-8.
- 630 R Core Team. (2015) R: A language and environment for statistical computing. pp. R Foundation for  
631 Statistical Computing, Vienna, Austria.
- 632 Tennessen, K. J. (1975) Reproductive Behavior and Isolation of Two Sympatric Coenagrionid  
633 Damselflies in Florida (Doctoral dissertation). Vol. Ph.D. dissertation. pp. University of Florida,  
634 Gainesville, FL.
- 635 Trabalon, M., Bagnères, A. G. & Roland, C., 1997. Contact sex signals in two sympatric spider species,  
636 *Tegenaria domestica* and *Tegenaria pagana*. *Journal of Chemical Ecology* **23**: 747–758.
- 637 Wellenreuther, M. & Sánchez-Guillén, R. A., 2016. Nonadaptive radiation in damselflies. *Evolutionary*  
638 *Applications* **9**: 103-18.
- 639 Wells, M. M. & Henry, C. S. (1998) Songs, reproductive isolation, and speciation in cryptic species of  
640 insects: A case study using green lacewings. In: *Endless Forms: Species and Speciation*. pp. 217-  
641 233. Oxford University Press, New York, NY.

- 642 Wheatcroft, D. & Qvarnström, A., 2017. Reproductive character displacement of female, but not male  
643 song discrimination in an avian hybrid zone. *Evolution* **71**: 1176-1786.
- 644 Wiernasz, D. C. & Kingsolver, J. G., 1992. Wing melanin pattern mediates species recognition in *Pieris*  
645 *occidentalis*. *Animal Behaviour* **43**: 89–94.
- 646 Wilkins, M. R., Seddon, N. & Safran, R. J., 2013. Evolutionary divergence in acoustic signals: causes and  
647 consequences. *Trends in ecology & evolution* **28**: 156-166.
- 648 Williams, T. H. & Mendelson, T. C., 2011. Female preference for male coloration may explain  
649 behavioural isolation in sympatric darters. *Animal Behaviour* **82**: 683–689
- 650 Williams, T. H. & Mendelson, T. C., 2014. Quantifying reproductive barriers in a sympatric pair of darter  
651 species. *Evolutionary Biology* **41**: 212-220.
- 652 Yang, Y., Richards-Zawacki, C. L., Devar, A. & Dugas, M. B., 2016. Poison frog color morphs express  
653 assortative mate preferences in allopatry but not sympatry. *Evolution* **70**: 2778–2788.
- 654 Yassin, A. & Orgogozo, V., 2013. Coevolution between male and female genitalia in the *Drosophila*  
655 *melanogaster* species subgroup. *PLoS One* **8**: e57158.
- 656 Yukilevich, R., 2012. Asymmetrical patterns of speciation uniquely support reinforcement in  
657 *Drosophila*. *Evolution* **66**: 1430-46.
- 658
- 659
- 660
- 661
- 662
- 663

664 **Figure legends**

665 **Figure 1. Sampling sites and species ranges.** *Enallagma anna*'s geographic range (red) occurs  
666 within *E. carunculatum*'s geographic range (orange). Names of sites associated with each  
667 number are described in Table 1. Symbol color indicates the species sampled and symbol shape  
668 indicates the population type. (Species ranges are adapted from Johnson, 2009; Paulson, 2009,,  
669 2011).

670

671 **Figure 2. *Enallagma anna* and *E. carunculatum* sensilla traits by population type. (A)** The  
672 number of sensilla on one mesostigmal plate. **(B)** Proportion of the plate that contains sensilla.  
673 **(C)** Mean nearest neighbor distances between sensilla. **(D)** Sensilla density in the region of the  
674 plate that contains sensilla. Within each panel, each open circle represents the mean of one  
675 population. Boxplots show the interquartile range. The line within the box shows the median  
676 and whiskers extend to the most extreme observation within 1.5 times the interquartile range.

677

678 **Figure 3. Individual trait values for sensilla number, sensilla density, and proportion of plate**  
679 **containing sensilla.** Each symbol represents a single female, separated by population along the  
680 y-axis. Horizontal lines indicate the mean value for each population type (completely allopatric,  
681 locally allopatric, or sympatric), calculated from population means. Populations are described  
682 in Table 1.

683

684 **Figure 4. Sensilla locations. (A)** White box indicates the location of right mesostigmal plate on  
685 the thorax. **(B)** Ultrastructural details of individual sensilla. Scale bar represents 10  $\mu\text{m}$ . **(C, D)**



686 Scanning electron micrographs show the locations of sensilla (yellow) on the mesostigmal  
687 plates of *E. anna* (C) and *E. carunculatum* (D). Scale bars represent 100  $\mu\text{m}$ . **(E, F)** Population  
688 kernel density estimates for *E. carunculatum* (E) and *E. anna* (F) sensilla. The shading indicates  
689 different regions of sensilla density: red represents the 75-99<sup>th</sup> percentile of sensilla density,  
690 orange represents the 50-74<sup>th</sup> percentile, and yellow represents the 25<sup>th</sup>-49<sup>th</sup> percentile. Each  
691 outline represents the average mesostigmal plate shape for the population. Asterisks indicate  
692 *E. carunculatum* populations whose KDEs are significantly different (\*  $P < 0.05$ , \*\*\*  $P < 0.001$ ).

693 **Table 1.** Sampling sites for *E. anna* and *E. carunculatum* populations.

| Type                      | Site (site number*)          | Species | Latitude  | Longitude | Year collected | N† | Source‡ |
|---------------------------|------------------------------|---------|-----------|-----------|----------------|----|---------|
| Sympatric                 | Big Spring, UT (1)           | Ea      | 40.7407   | -112.6472 | 2016           | 10 | AB      |
|                           |                              | Ec      |           |           |                | 4  |         |
|                           | Big Sandy Creek, MT (2)      | Ec      | 48.4519   | -109.9199 | 2015           | 1  | AB      |
|                           |                              |         |           |           |                |    |         |
|                           | Creston, MT (3)              | Ea      | 48.2437   | -114.1406 | 1972           | 1  | BM      |
|                           | Dry Sheep Creek, NE (4)      | Ea      | 41.9999   | -103.9706 | 2012           | 1  | BM      |
|                           |                              |         |           |           |                |    |         |
|                           | Fish Springs Run, CA (5)     | Ea      | 37.0794   | -118.2539 | 1998           | 2  | BM      |
|                           |                              |         |           |           |                |    |         |
|                           | Grace Coolidge Creek, SD (6) | Ea      | 43.8072   | -103.4502 | 1969           | 1  | BM      |
|                           |                              |         |           |           |                |    |         |
| Horseshoe Springs, UT (7) | Ea                           | 40.6203 | -112.7099 | 2016      | 1              | AB |         |
|                           |                              | Ec      |           |           |                | 1  |         |
| Long Valley Creek, CA (8) | Ea                           | 39.7315 | -120.0434 | 1973      | 5              | DP |         |
|                           |                              |         |           |           |                |    |         |
| Murray Creek, NV (9)      | Ea                           | 39.2669 | -114.8687 | 2001      | 1              |    |         |
| Malad River, UT (10)      | Ec                           | 41.8652 | -112.1692 | 1983      | 2              | BM |         |
| Niwt Ditch, CO (11)       | Ea                           | 40.1632 | -105.1544 | 2015      | 2              | AB |         |
|                           |                              | Ec      |           |           |                | 1  |         |

|            |                              |    |         |           |      |    |    |
|------------|------------------------------|----|---------|-----------|------|----|----|
|            | Pondera Coulee, MT           | Ea | 48.1892 | -111.3268 | 2015 | 1  | AB |
|            | (12)                         | Ec |         |           |      | 1  |    |
| Locally    | Beaver Creek, WY             | Ea | 42.6417 | -108.3475 | 2015 | 1  | AB |
| allopatric | (13)                         |    |         |           |      |    |    |
|            | Indian Road Camp,<br>MT (14) | Ec | 46.3336 | -111.5254 | 2015 | 4  | AB |
|            | Jackson, WY (15)             | Ea | 43.5363 | -110.7629 | 1971 | 2  | BM |
|            | Muddy Creek, MT<br>(16)      | Ea | 47.9796 | -112.1565 | 2015 | 1  | AB |
|            | Strawberry River, UT<br>(17) | Ec | 40.1692 | -110.4229 | 2016 | 1  | AB |
|            | West Greenbelt, CO<br>(18)   | Ec | 39.7742 | -105.1350 | 2014 | 9  | AB |
| Allopatric | Bull Lake, MT (19)           | Ec | 48.2262 | -115.8404 | 2015 | 1  | AB |
|            | Crab Creek, WA (20)          | Ec | 46.8317 | -119.8431 | 2016 | 20 | DP |
|            | Clear Lake, IN (21)          | Ec | 41.7360 | -84.8397  | 1945 | 1  | BM |
|            | Columbia River, WA<br>(22)   | Ec | 45.83   | -122.77   | 1952 | 2  | BM |
|            | Douglas Lake, MI (23)        | Ec | 45.5606 | -84.6741  | 2016 | 17 | OF |
|            | Flathead River, MT<br>(24)   | Ec | 47.3678 | -114.5776 | 2015 | 4  | AB |
|            | Home Lake, CO (25)           | Ec | 37.5756 | -106.0937 | 2015 | 1  | AB |

|                      |    |         |           |      |   |    |
|----------------------|----|---------|-----------|------|---|----|
| Little Lake, CA (26) | Ec | 35.9490 | -117.9023 | 1967 | 1 | DP |
| Drumond Island, MI   | Ec | 46.00   | -83.66    | 2002 | 1 | BM |
| (27)                 |    |         |           |      |   |    |
| Snake River, ID (28) | Ec | 43.7231 | -112.0865 | 1983 | 2 | BM |

---

694 \*Site number corresponds to the locations numbered in Figure 1

695 † N: number of females that were imaged and measured for this study.

696 ‡ Sources: A. Barnard (AB), Ola Fincke (OF), Bill Mauffray (BM), and Dennis Paulson (DP).

697 **Table 2.** Statistical comparison of sensilla traits in locally allopatric and sympatric *E. anna*  
 698 populations.

| Trait                                              | Mean $\pm$ s.e.m.           |                      | <i>t</i> | d.f. | <i>P</i> |
|----------------------------------------------------|-----------------------------|----------------------|----------|------|----------|
|                                                    | Local allopatry<br>(N* = 3) | Sympatry<br>(N = 10) |          |      |          |
| Sensilla number                                    | 39.8 $\pm$ 3.8              | 48.5 $\pm$ 2.3       | -1.93    | 3.6  | 0.13     |
| Proportion plate containing<br>sensilla            | 0.67 $\pm$ 0.27             | 0.69 $\pm$ 0.15      | -0.25    | 2.8  | 0.82     |
| Sensilla density (sensilla<br>mm <sup>-1</sup> )   | 1.5 $\pm$ 0.2               | 1.6 $\pm$ 0.1        | -0.43    | 2.9  | 0.70     |
| Mean distance ( $\mu$ m)<br>between sensilla pairs | , 20.0 $\pm$ 1.0            | , 19.3 $\pm$ 0.5     | 0.62     | 3.13 | 0.58     |

699 \* N: number of populations analyzed.

700

701

702

703

704

705

706

707

708

709 **Table 3.** Results of pairwise comparisons of sensilla kernel density estimates for *E.*  
 710 *carunculatum* populations. False discovery rate-adjusted *P*-values are reported<sup>†</sup>.

| Population         | Big Springs, UT | Crab Creek, WA             | Douglas Lake, MI | Flathead River, MT | West Greenbelt, CO | N* | Population type       |
|--------------------|-----------------|----------------------------|------------------|--------------------|--------------------|----|-----------------------|
| Big Springs, UT    | 1               |                            |                  |                    |                    | 4  | sympatric             |
| Crab Creek, WA     |                 | 1                          |                  |                    |                    | 20 | allopatric            |
| Douglas Lake, MI   | 0.263           | <b>2.53e<sup>-10</sup></b> | 1                |                    |                    | 17 | allopatric            |
| Flathead River, MT | 1               | <b>0.0103</b>              | 0.263            | 1                  |                    | 4  | allopatric<br>Locally |
| West Greenbelt, CO | 1               | 0.0625                     | 0.3835           | 0.502              | 1                  | 4  | allopatric<br>Locally |
| Indian River, MT   | 1               | 1                          | <b>0.0103</b>    | 0.0625             | 0.3115             | 4  | allopatric            |

711 \* N: number of females whose sensilla coordinates were used to calculate KDEs.

712 † Bold values indicate *P* < 0.05.

713 **Figure 1.**

714

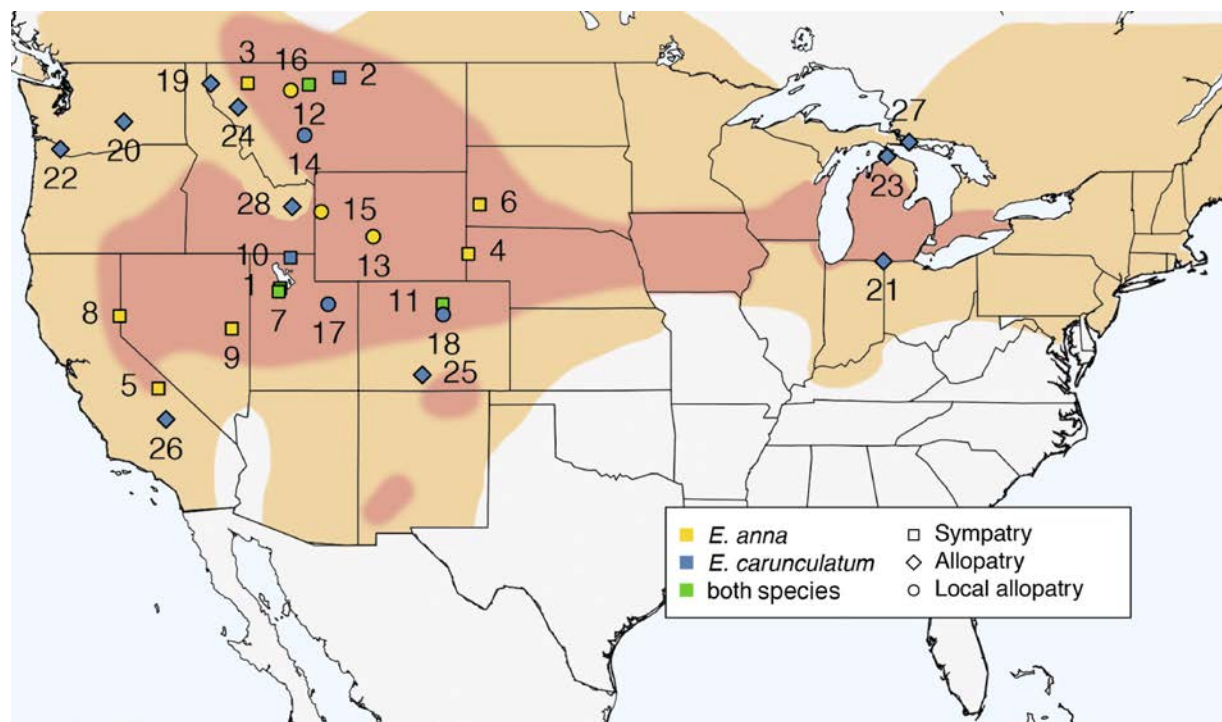

718 **Figure 2.**

719

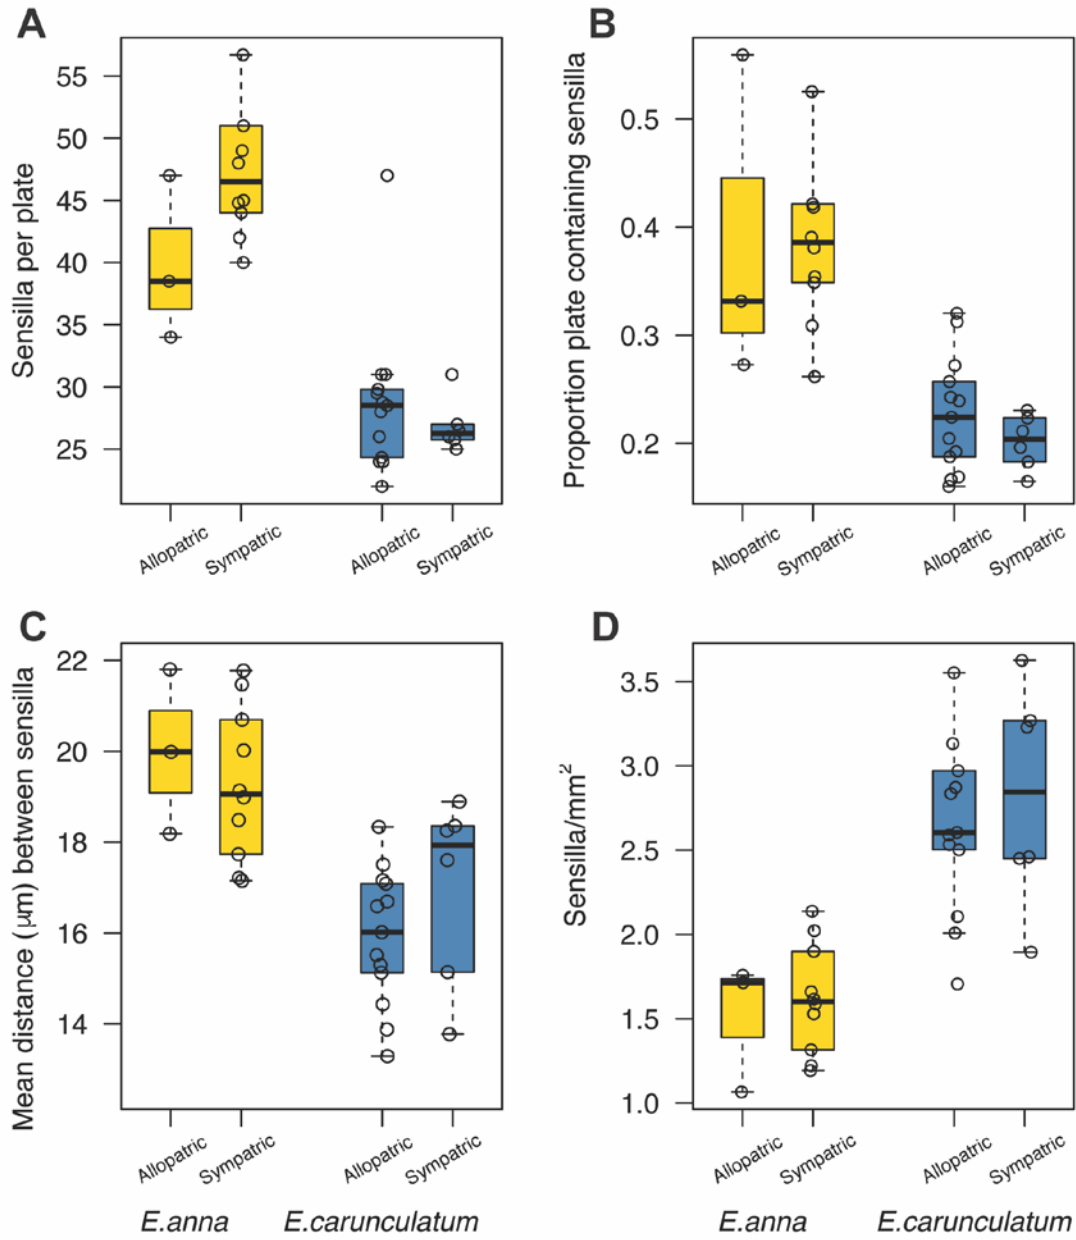

720



721 **Figure 3.**

722

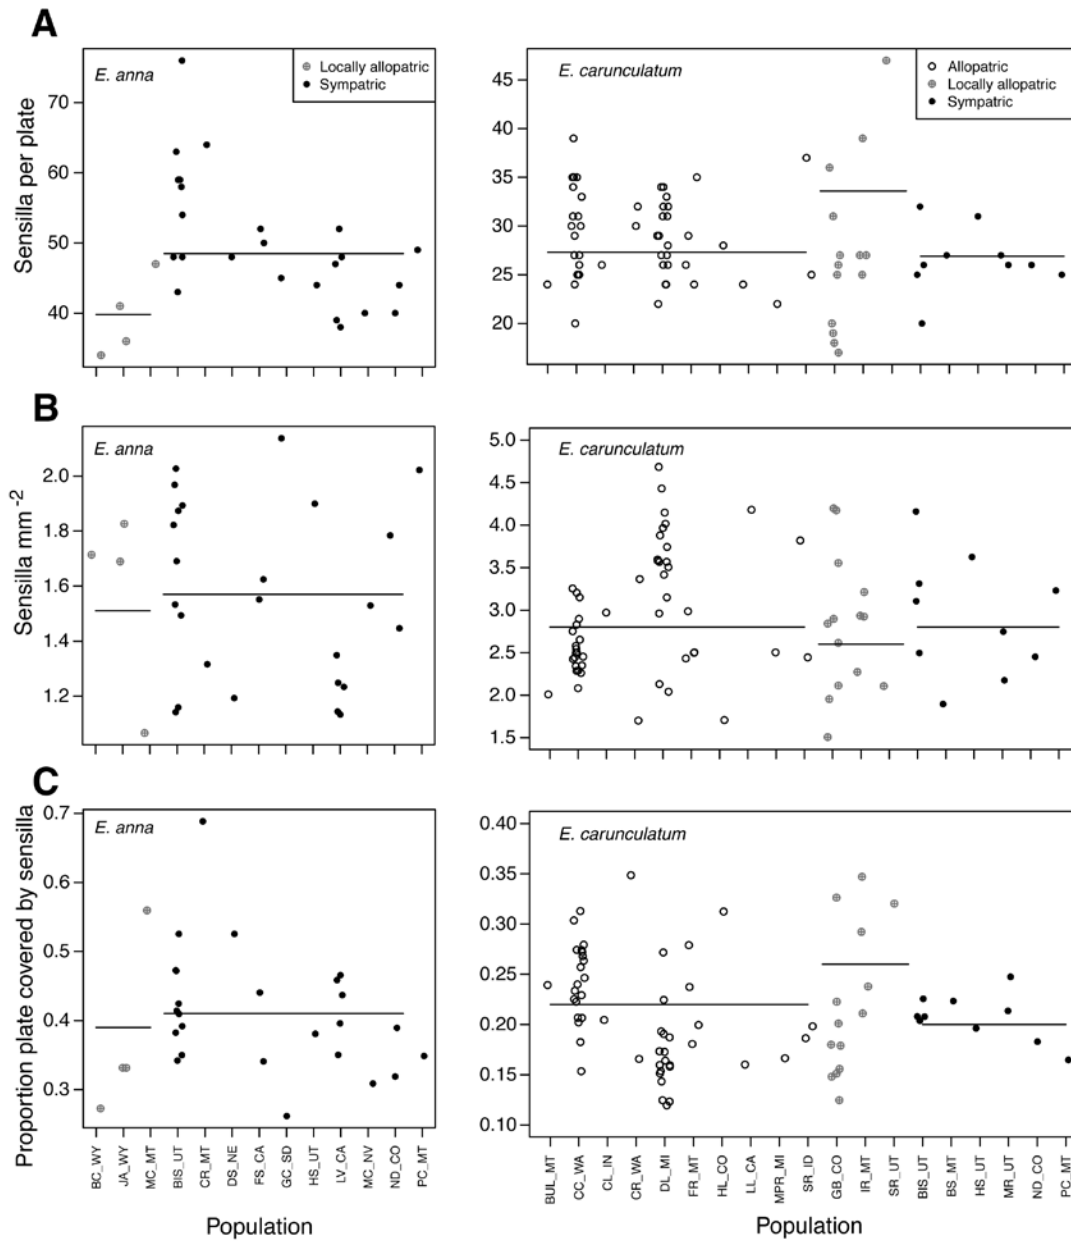

723

724

725 **Figure 4.**

726

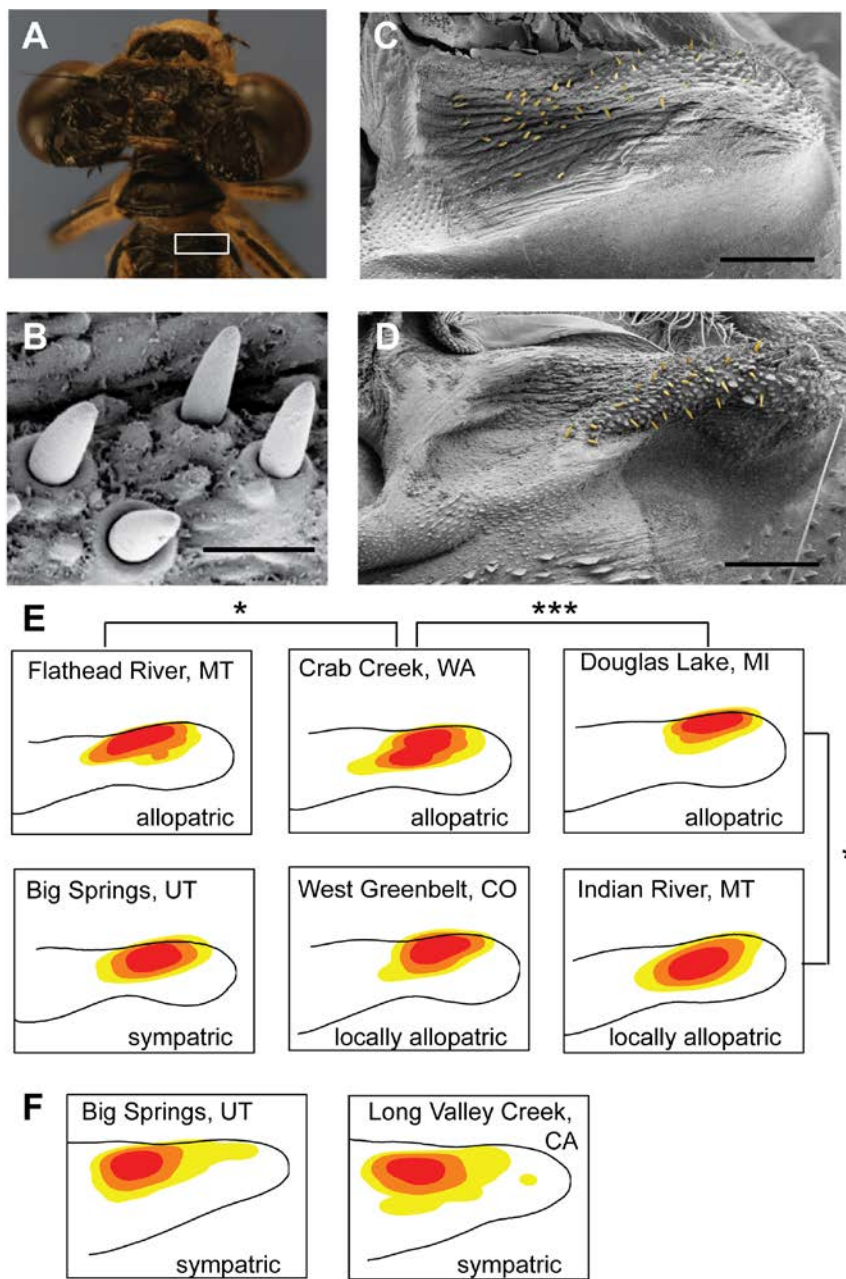

727

728

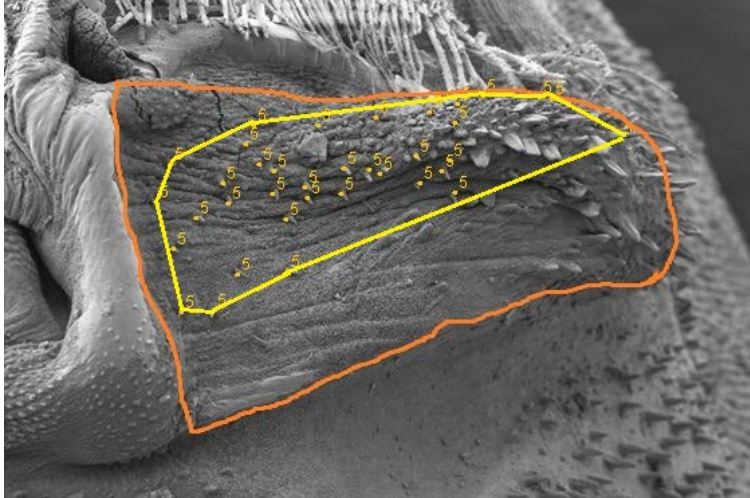

729

730 **Figure S1.** Method to obtain  $(x, y)$  coordinates of mesostigmal plate outline and individual  
731 sensilla from scanning electron microscope images. The orange line shows the outline that  
732 represents the boundaries of the mesostigmal plate. Yellow dots indicate individual sensilla.  
733 The yellow line around the sensilla shows the polygon generated by connecting the outermost  
734 sensilla.

735

736 **Table S1.** Statistical comparison of sensilla traits among sympatric, locally allopatric, and fully  
 737 allopatric *E. carunculatum* populations.

| Trait                                              | Mean $\pm$ s.e.m.     |                            |                      | $\chi^2_2$ <sup>†</sup> | P    |
|----------------------------------------------------|-----------------------|----------------------------|----------------------|-------------------------|------|
|                                                    | Sympatry S<br>(N = 1) | Local allopatry<br>(N = 2) | Allopatry<br>(N = 3) |                         |      |
| Sensilla number                                    | 25.8                  | 26.9 $\pm$ 2.6             | 29.0 $\pm$ 0.4       | 2.79                    | 0.25 |
| Proportion plate<br>containing sensilla            | 0.21                  | 0.23 $\pm$ 0.30            | 0.21 $\pm$ 0.23      | 0.04                    | 0.98 |
| Sensilla density (sensilla<br>mm <sup>-2</sup> )   | 15.1                  | 17.3 $\pm$ 0.2             | 15.9 $\pm$ 0.8       | 2.14                    | 0.34 |
| Mean distance ( $\mu$ m)<br>between sensilla pairs | 3.27                  | 2.85 $\pm$ 0.02            | 2.91 $\pm$ 0.32      | 0.86                    | 0.65 |

738 \* N refers to the number of populations analyzed.

739 <sup>†</sup>  $\chi^2_2$  refers to the Kruskal-Wallis chi-squared value with 2 degrees of freedom.

740

741

742

743

744

745

746

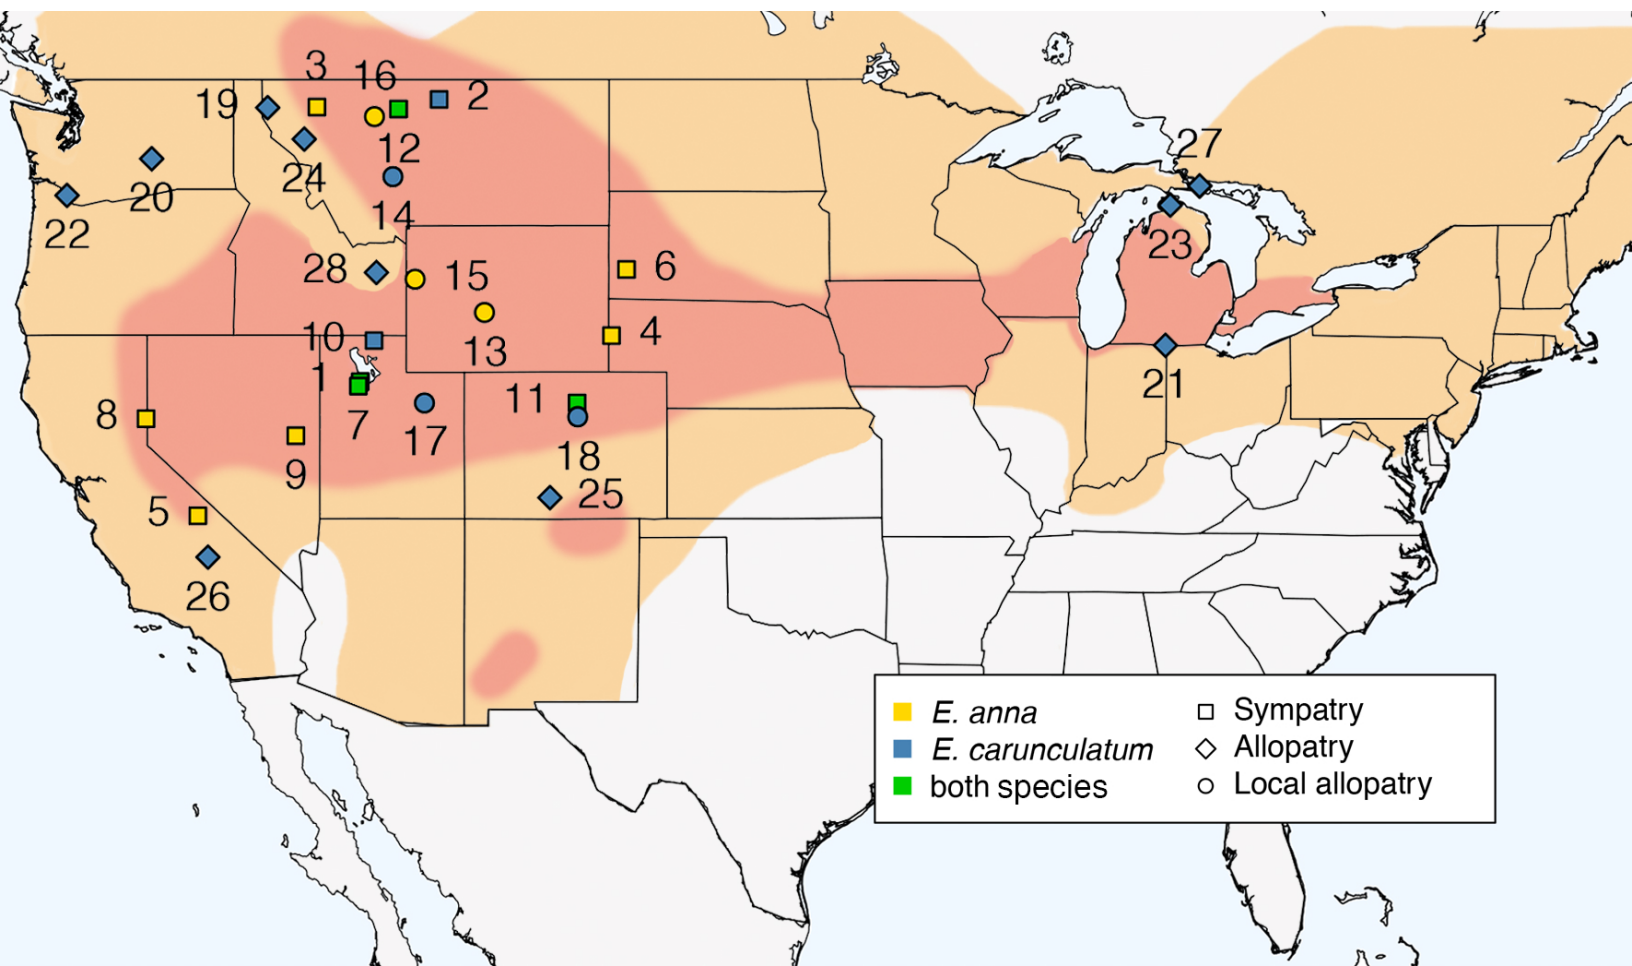

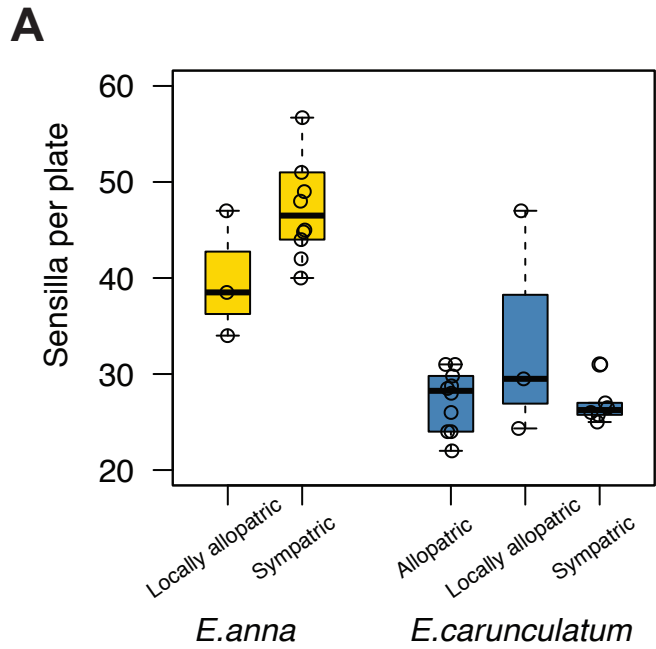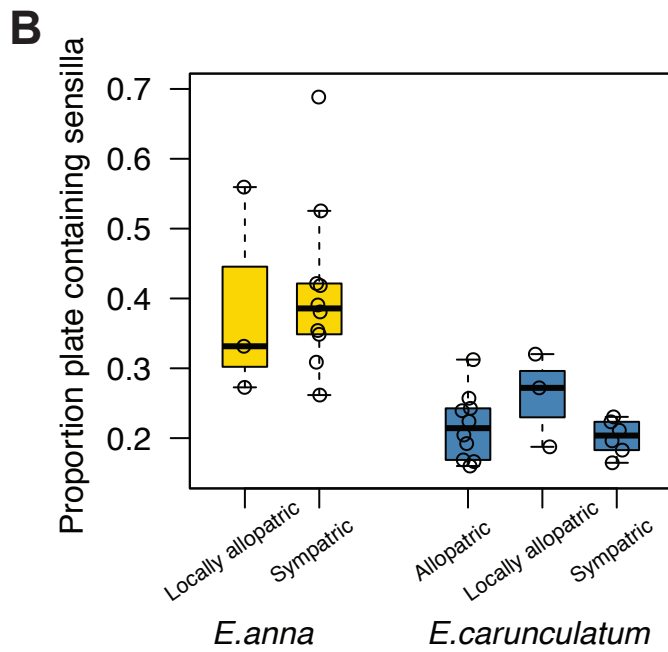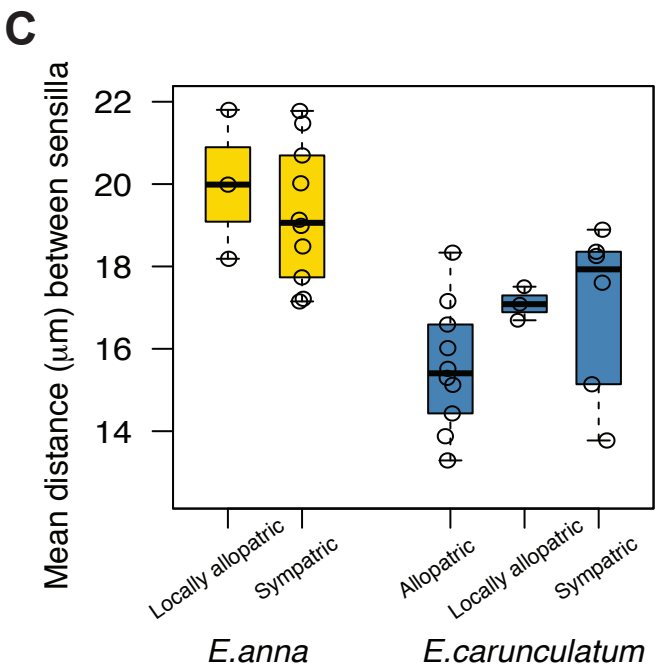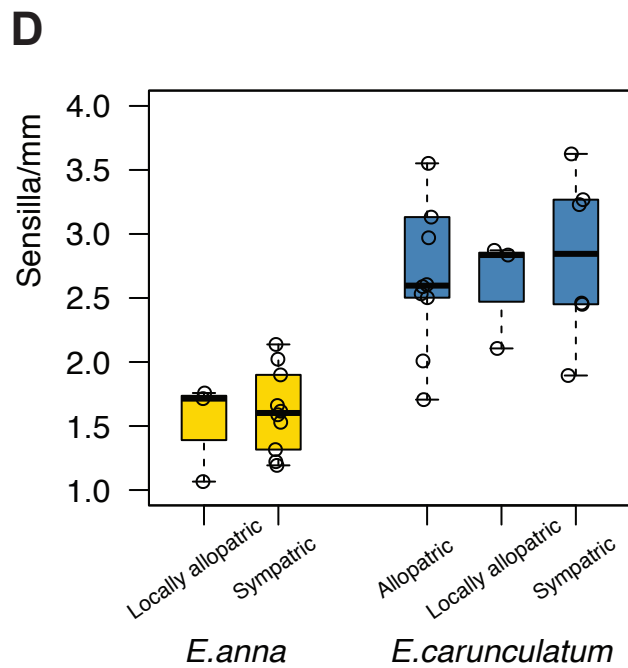

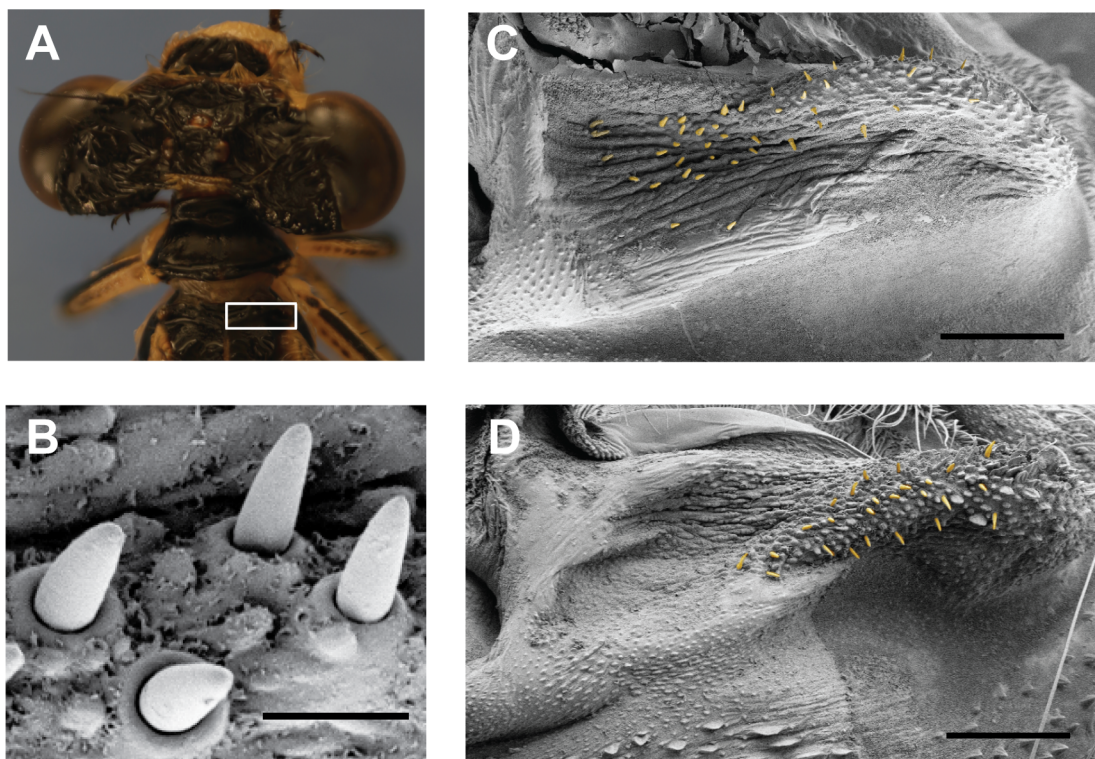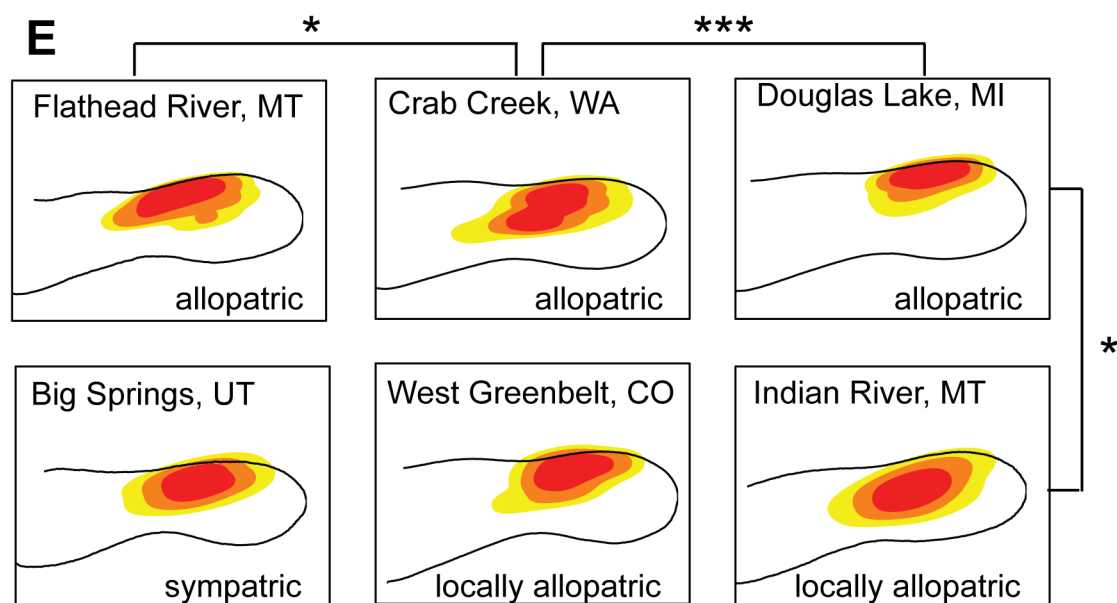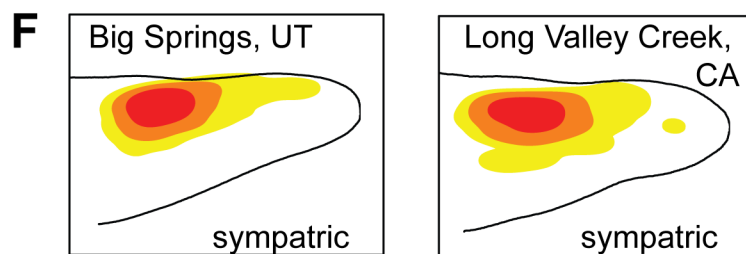

**A**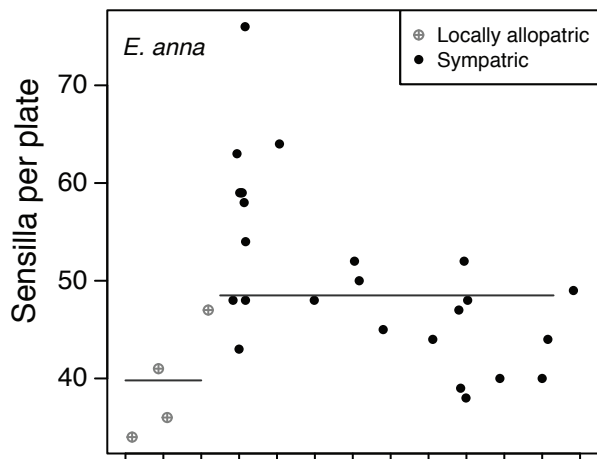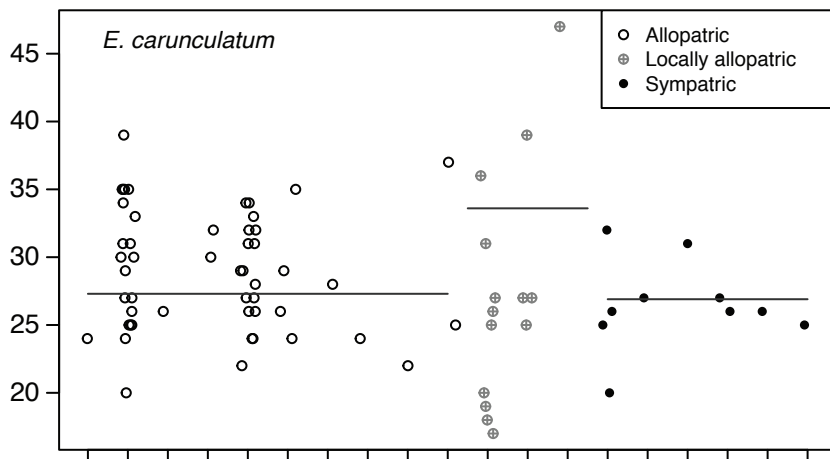**B**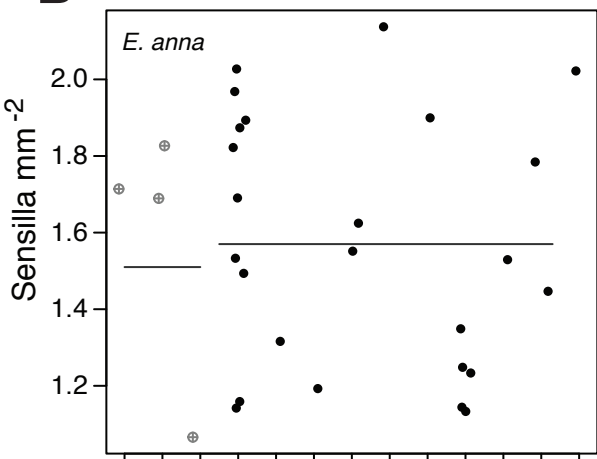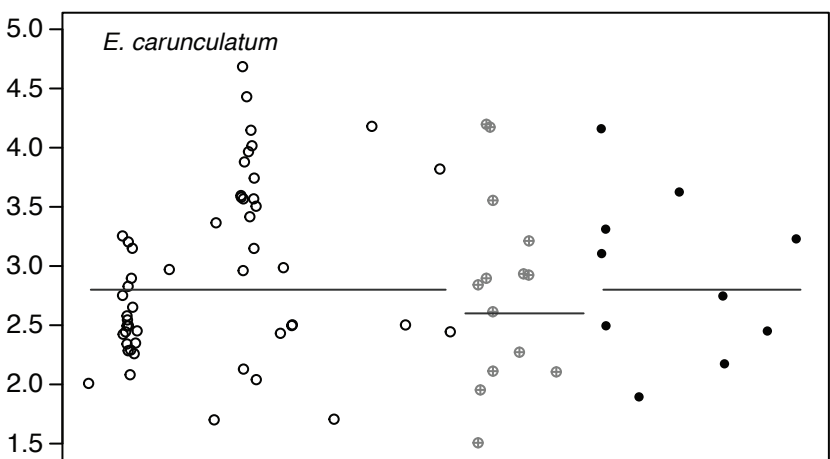**C**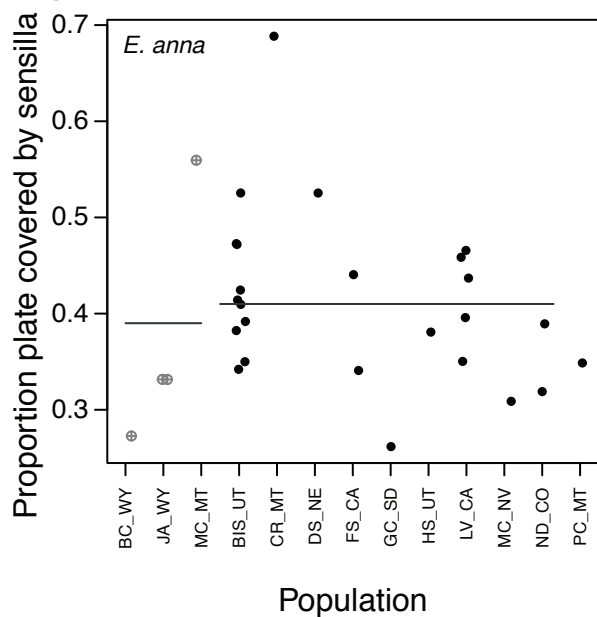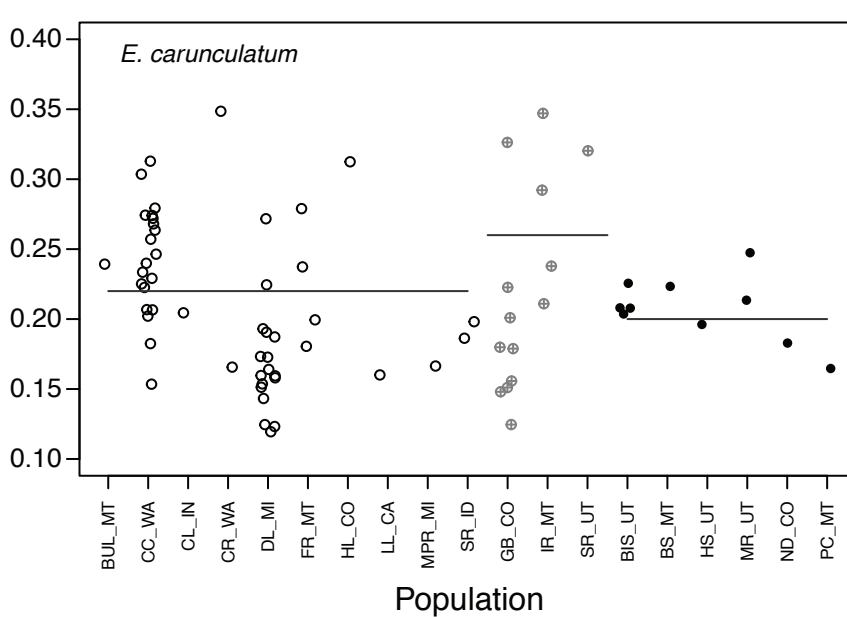

Source: https://www.biorxiv.org/content/10.1101/285833v2.full.pdf
